# Supplementary material
Source: Research Square preprint supplement (doi:10.21203/rs.3.rs-8544428/v1)
Supplement: Supplementary file 1 [file 1c4effa3167ab1368aa47e08.docx]

**SUPPLEMENTARY FIGURES**

**
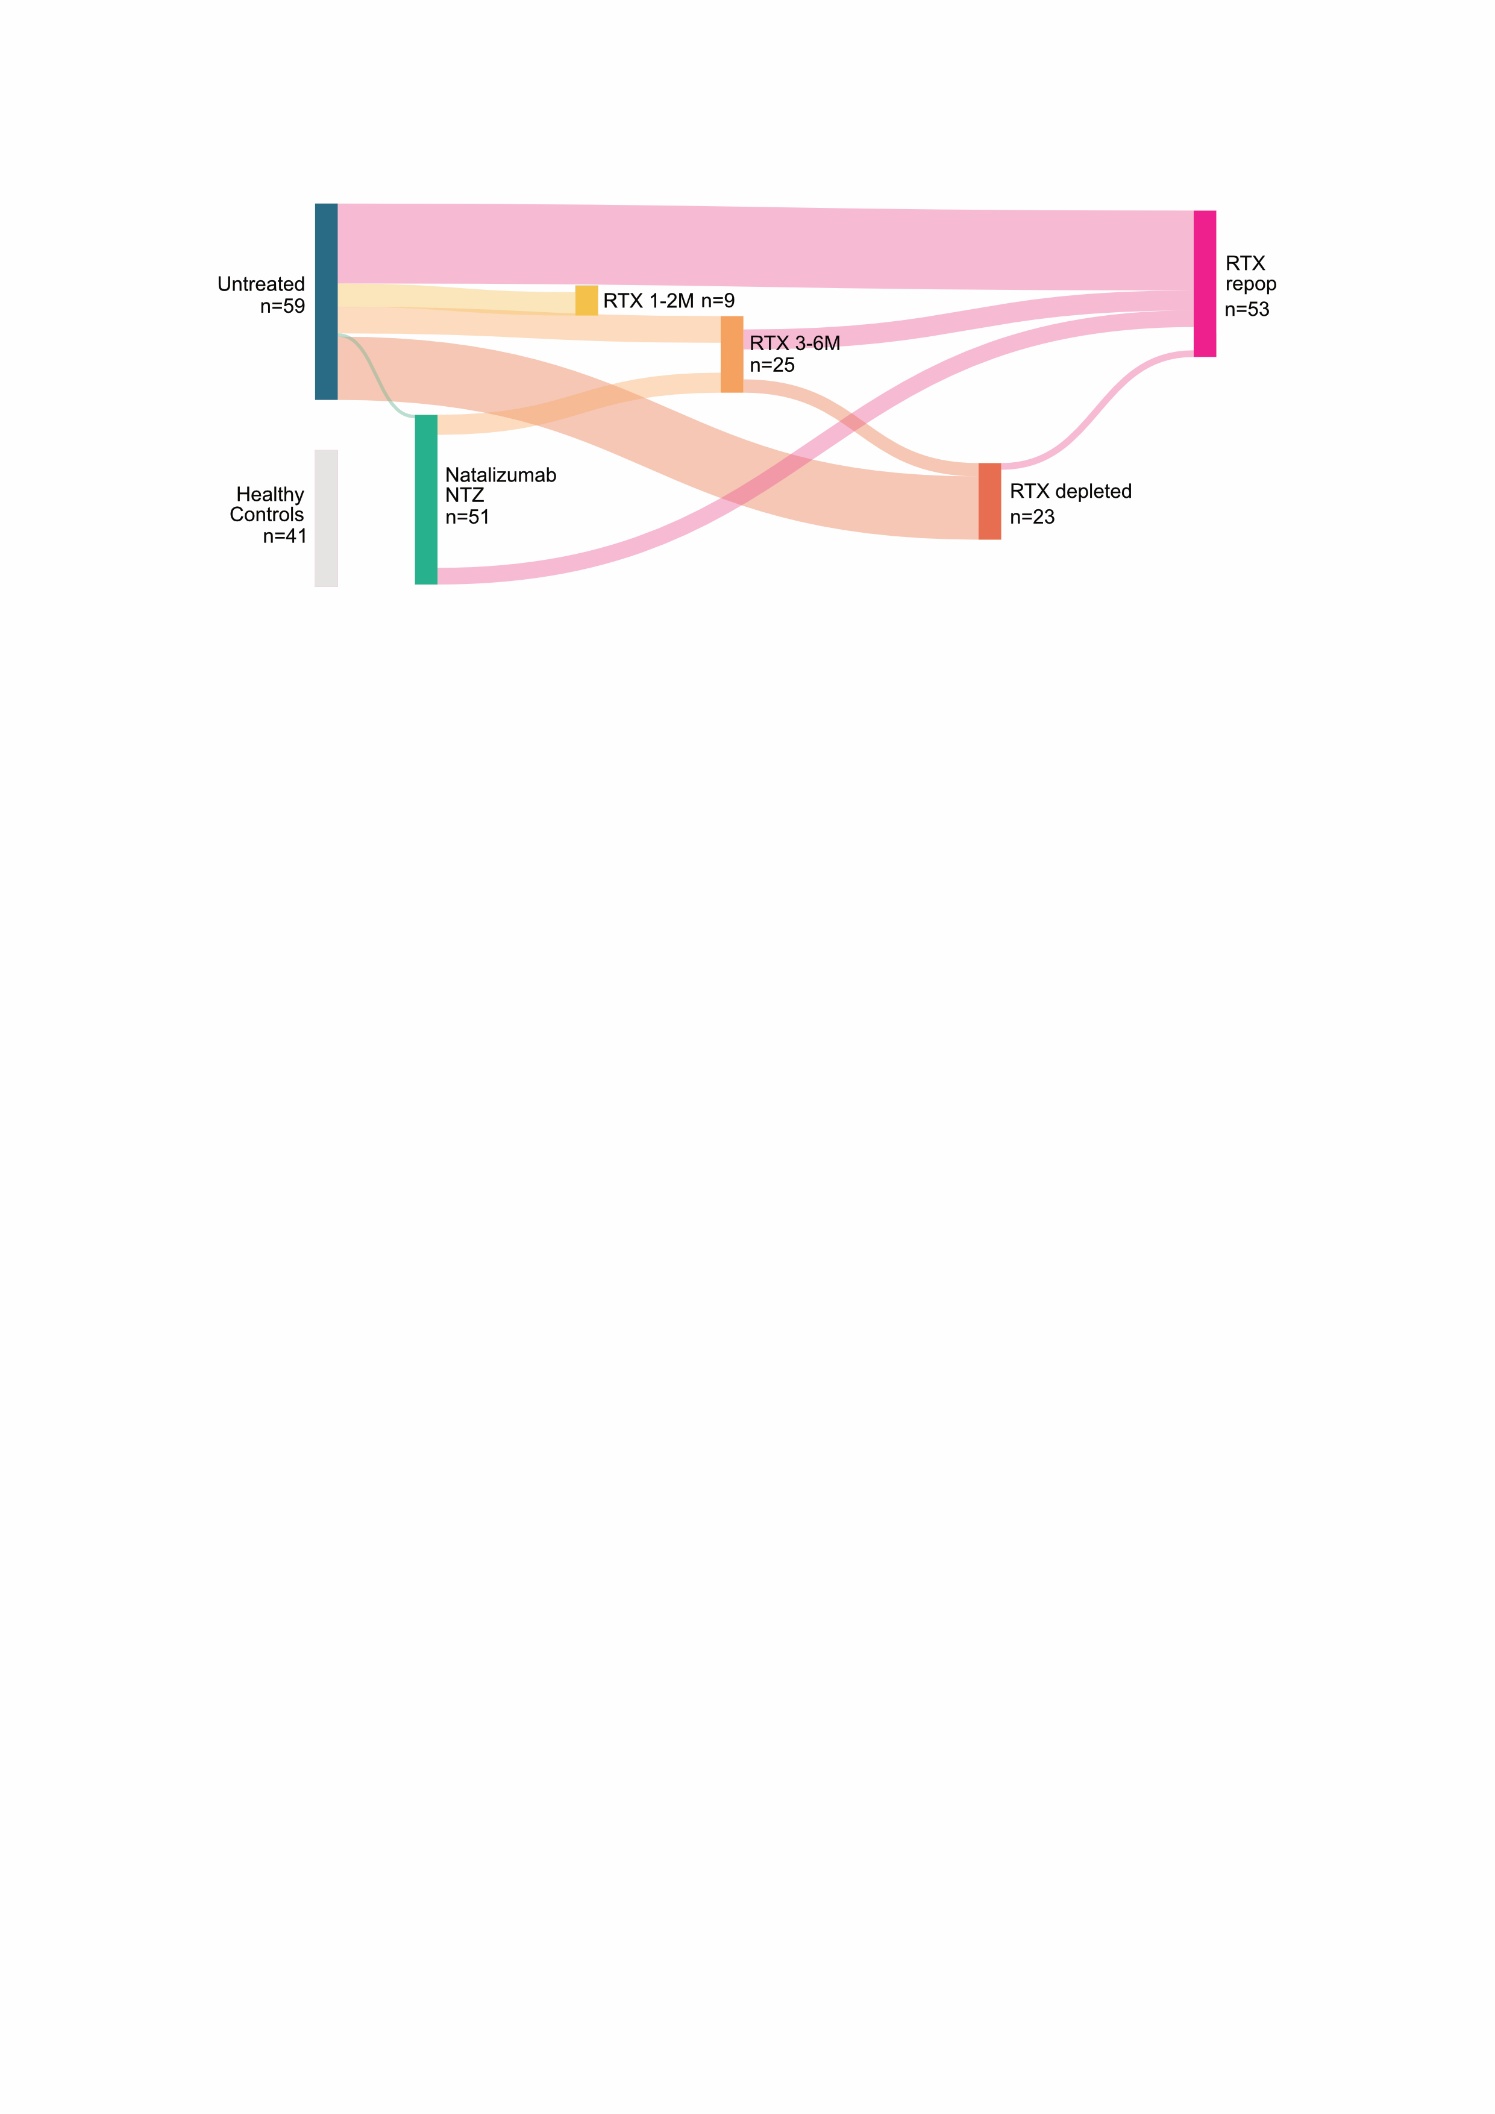
**

**Supplementary Figure 1. Sankey plot of cohort designed and paired samples.**

**
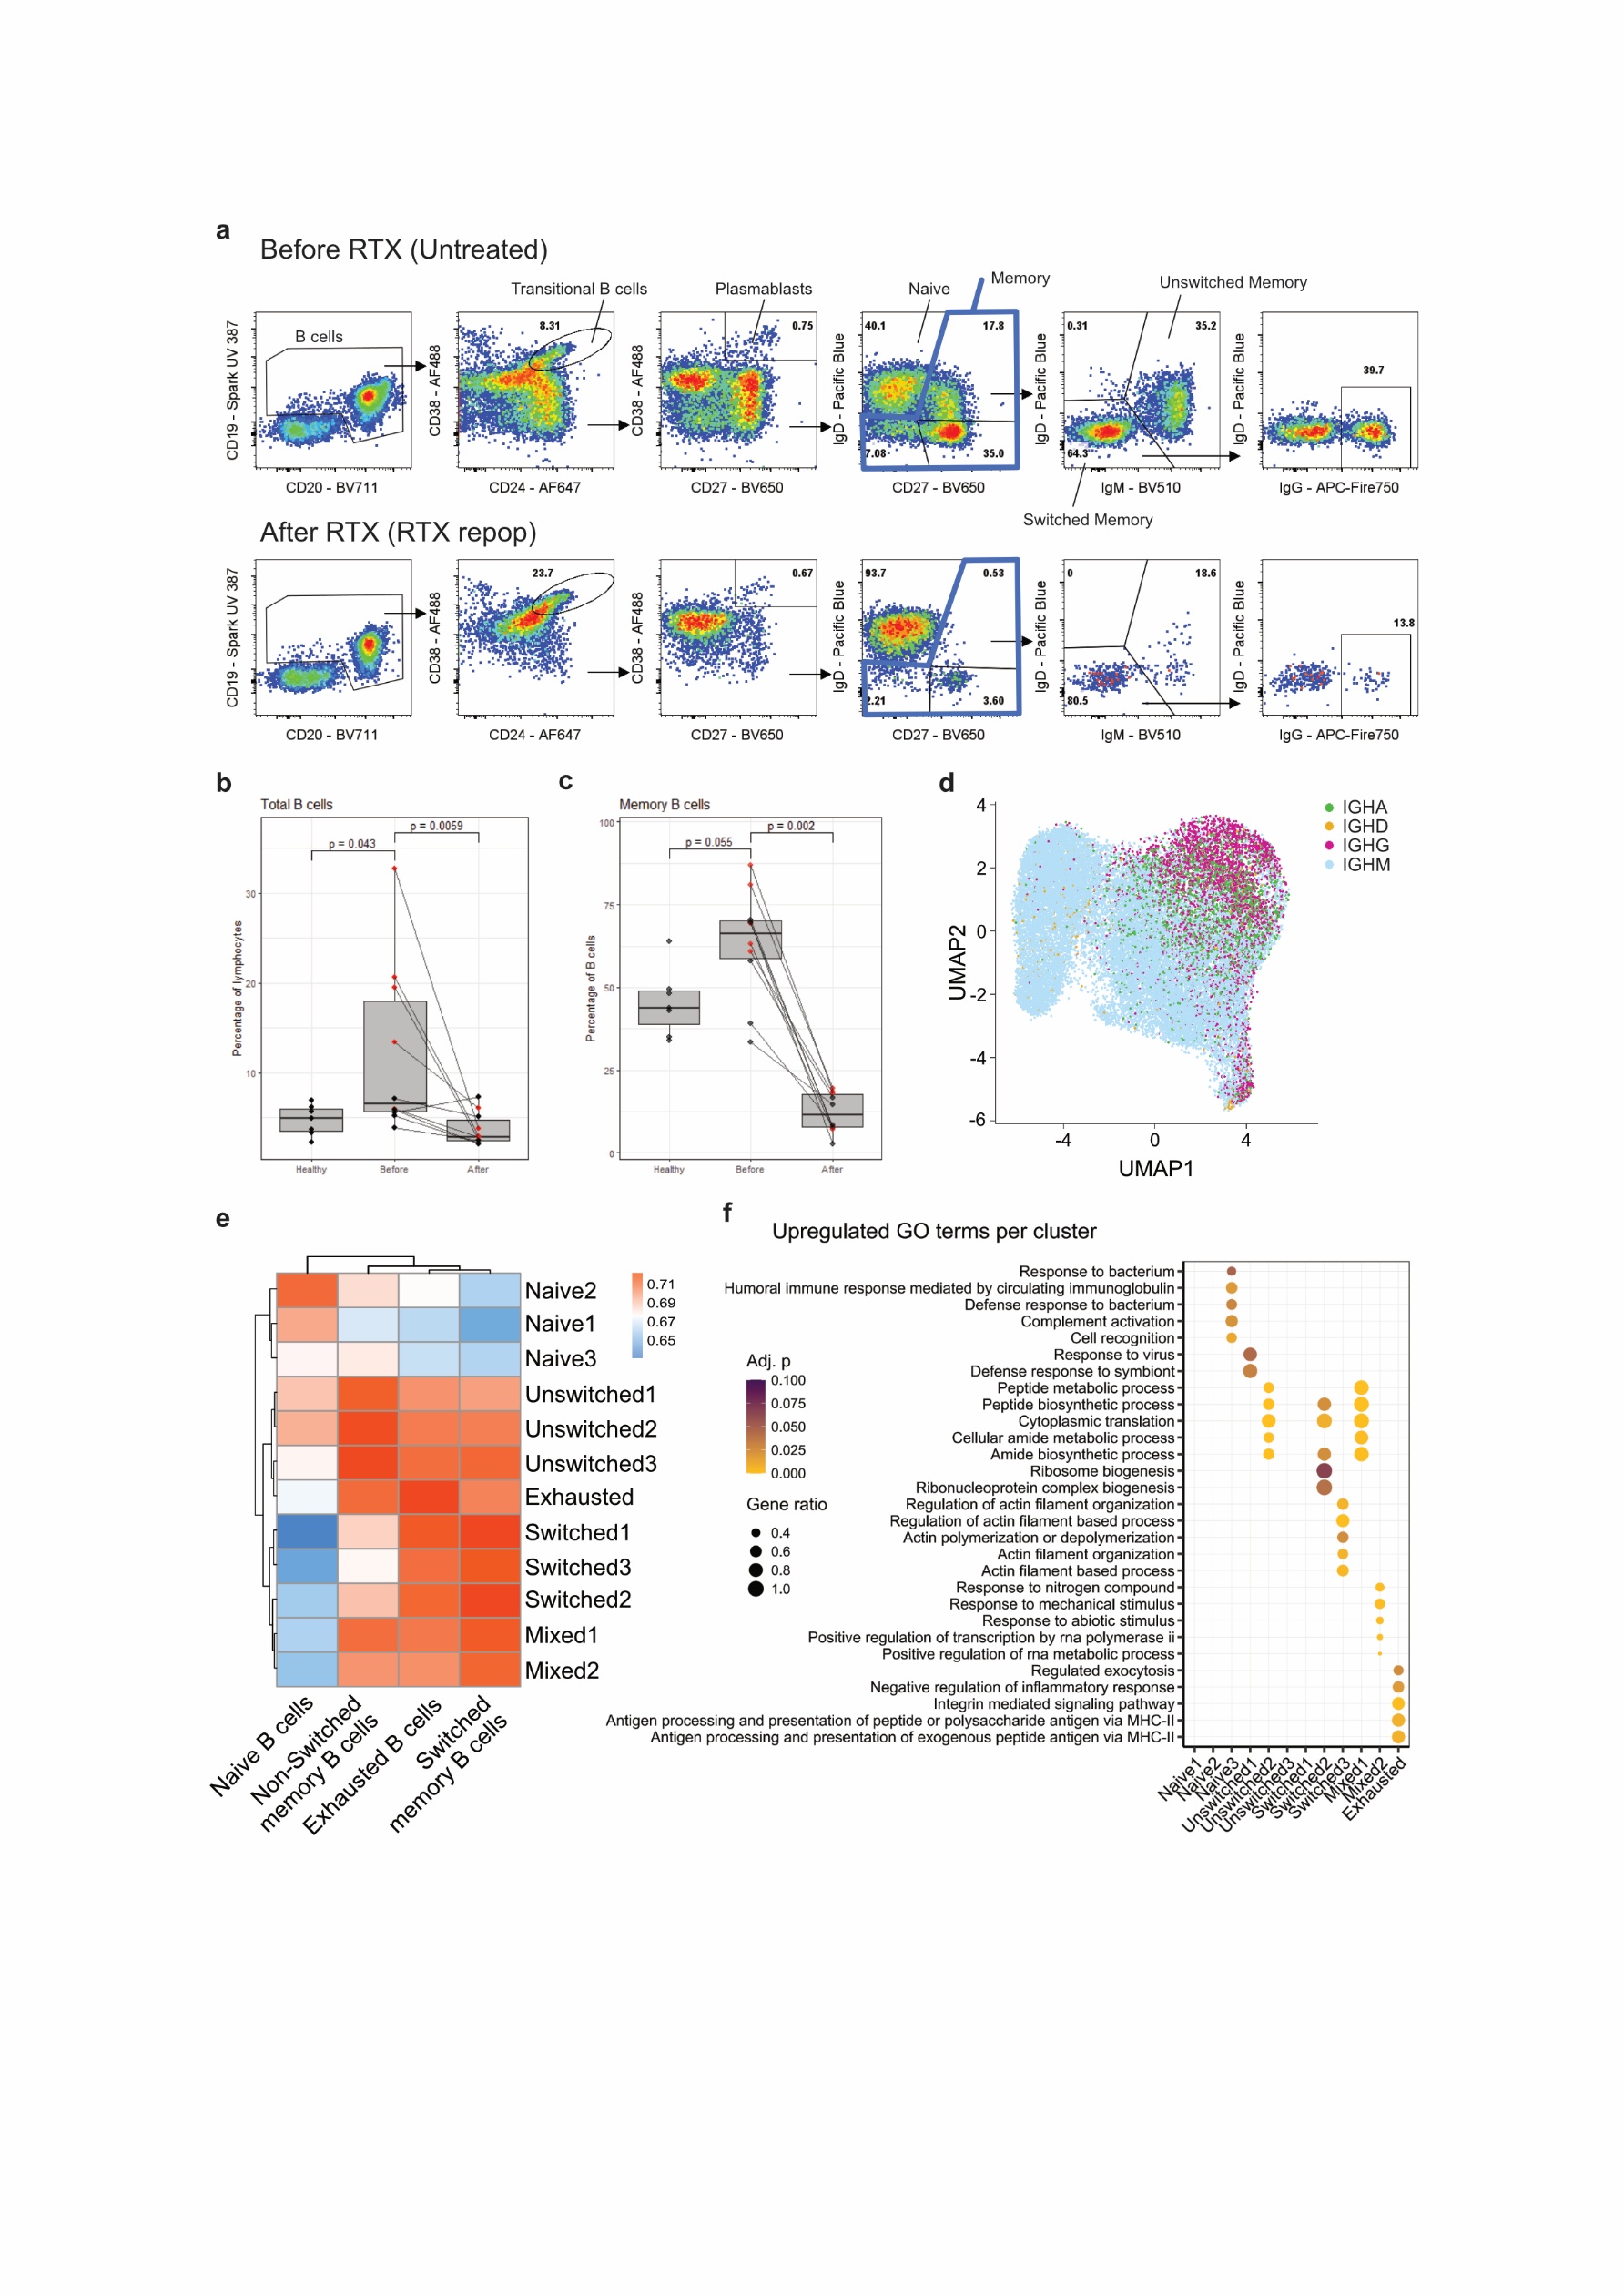
**

**Supplementary Figure 2. B-cell sorting for single-cell transcriptomics and cluster annotation. a**, FACS gating strategy and sorting of B cells for single-cell transcriptomics. Percentage of total B cells over total lymphocytes (**b**), memory B cells over total B cells (**c**) of samples used for single-cell transcriptomics. **d**, UMAP representation of B cells expressing different immunoglobulin heavy chains. **e**, Heatmap of Monaco annotation scores for B-cell subsets by cluster. **f**, GSEA for Gene Ontology (GO) terms of differentially expressed genes in individual clusters compared to the rest of the clusters.


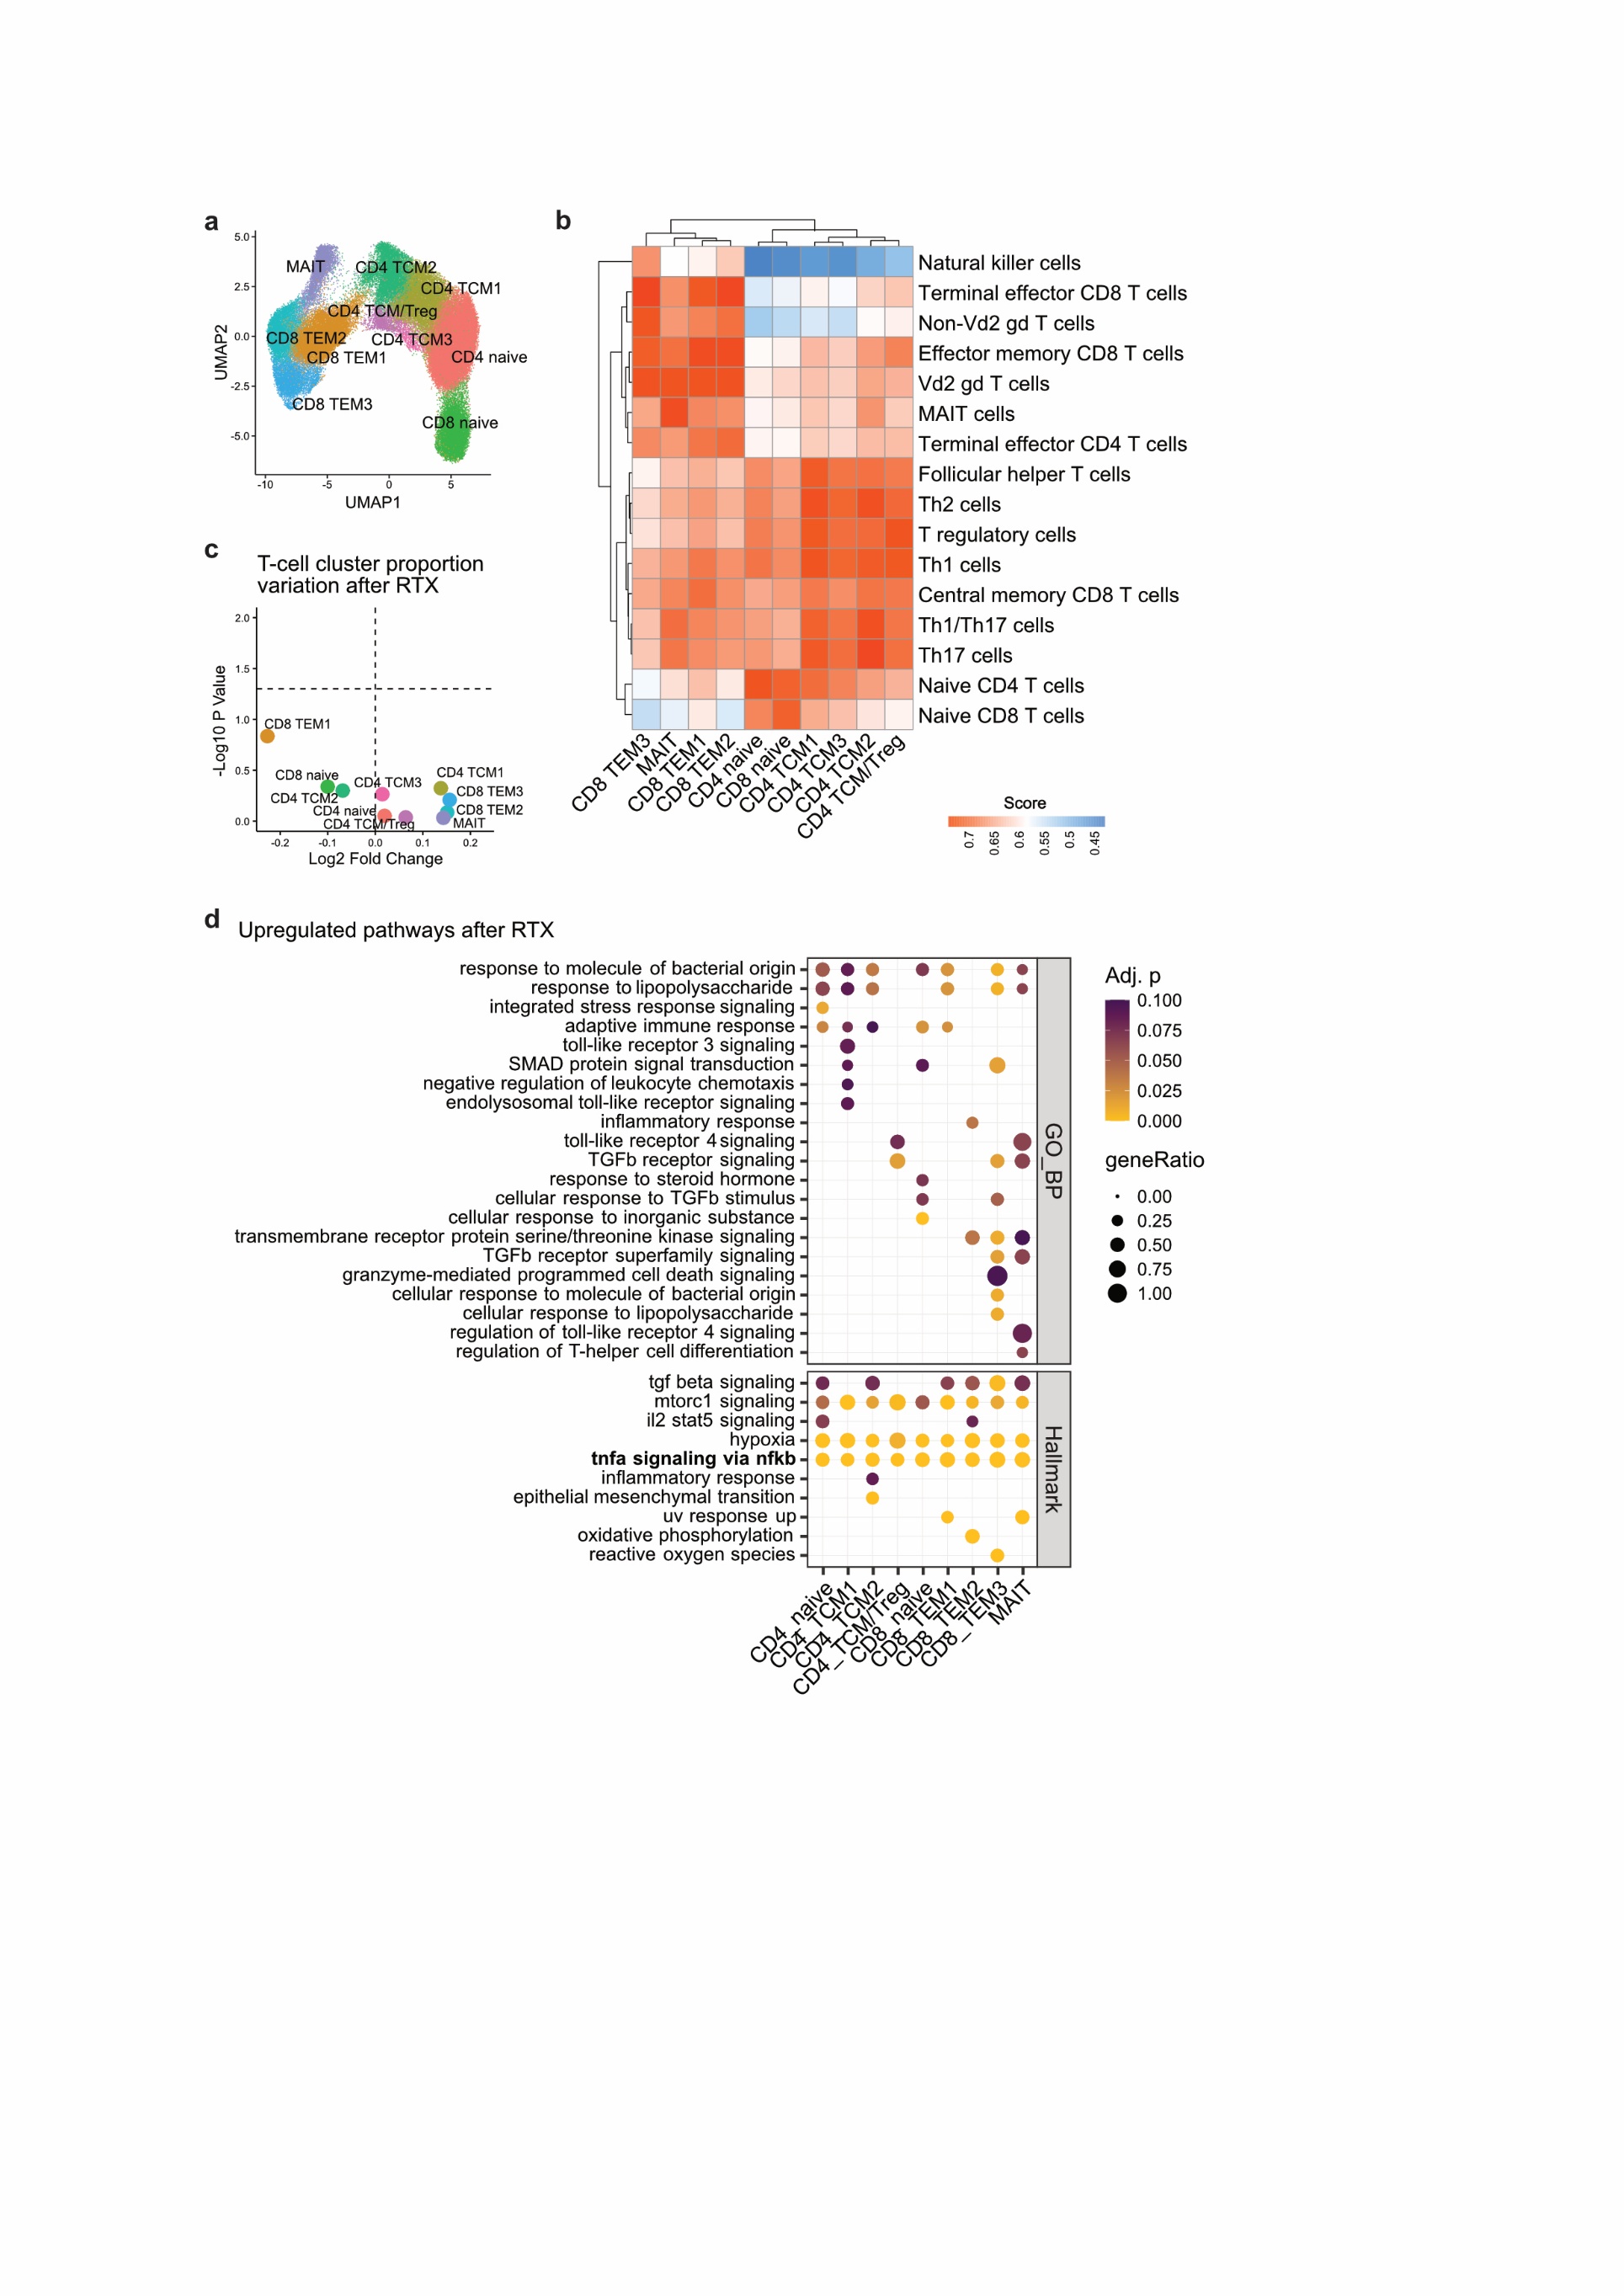


**Supplementary Figure 3. Single-cell transcriptomic of T cells and cluster annotation. a**, UMAP representation of clustered T cells. **b**, Heatmap of Monaco annotation score for T-cell subsets by cluster. **c**, Volcano plot of cluster proportion change in T cells at B-cell repopulation compared to baseline before RTX. **d**, Gene ontology/biological processes (GO_BP) and Hallmark terms upregulated in T-cell clusters after RTX according to GSEA performed on ranked logFC. Adj.p: false discovery rate (FDR)-adjusted p-value (FDR threshold 0.1); geneRatio: proportion of core enrichment genes on the total of pathway genes. Immune-related pathways in bold.


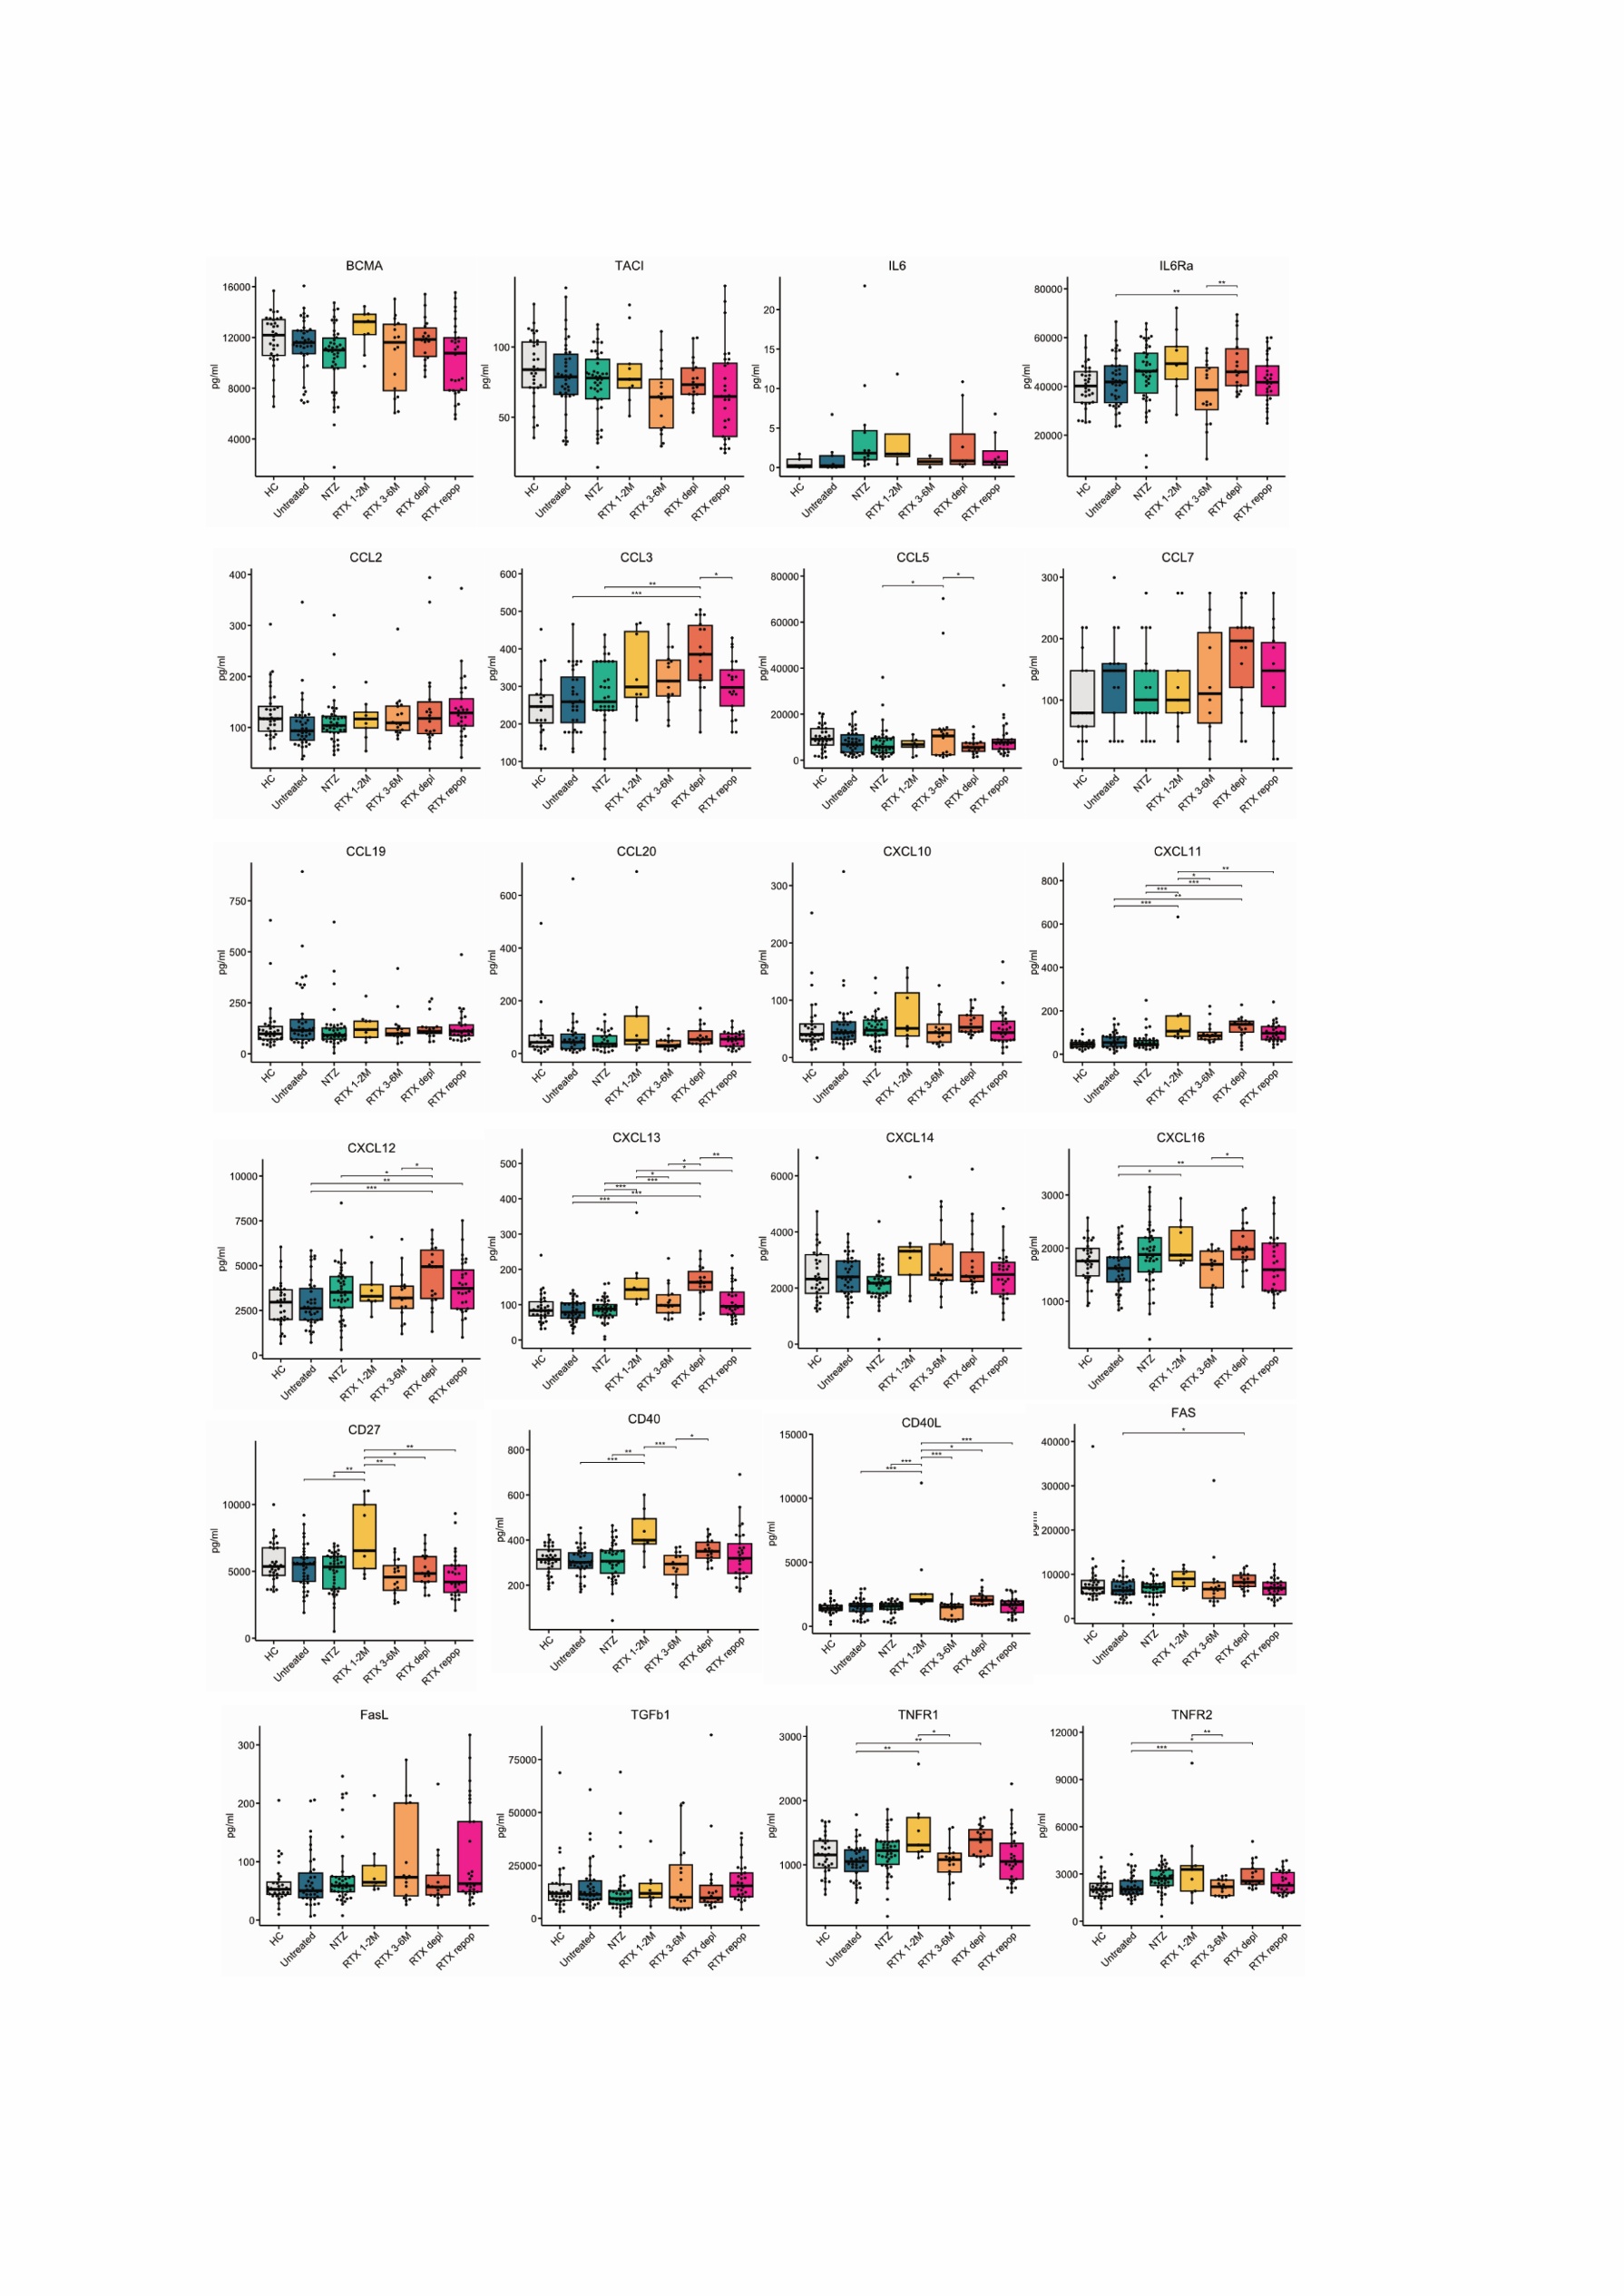


**Supplementary Figure 4. Luminex analysis across sample groups for 27 analytes in plasma.** Only significant pairwise comparison between RTX treated samples and untreated pwMS are reported on the graph for clarity reasons. P values are calculated using a mixed-effects model including individual ID to account for paired data. * p<0.05, **p<0.01, ***p<0.001.


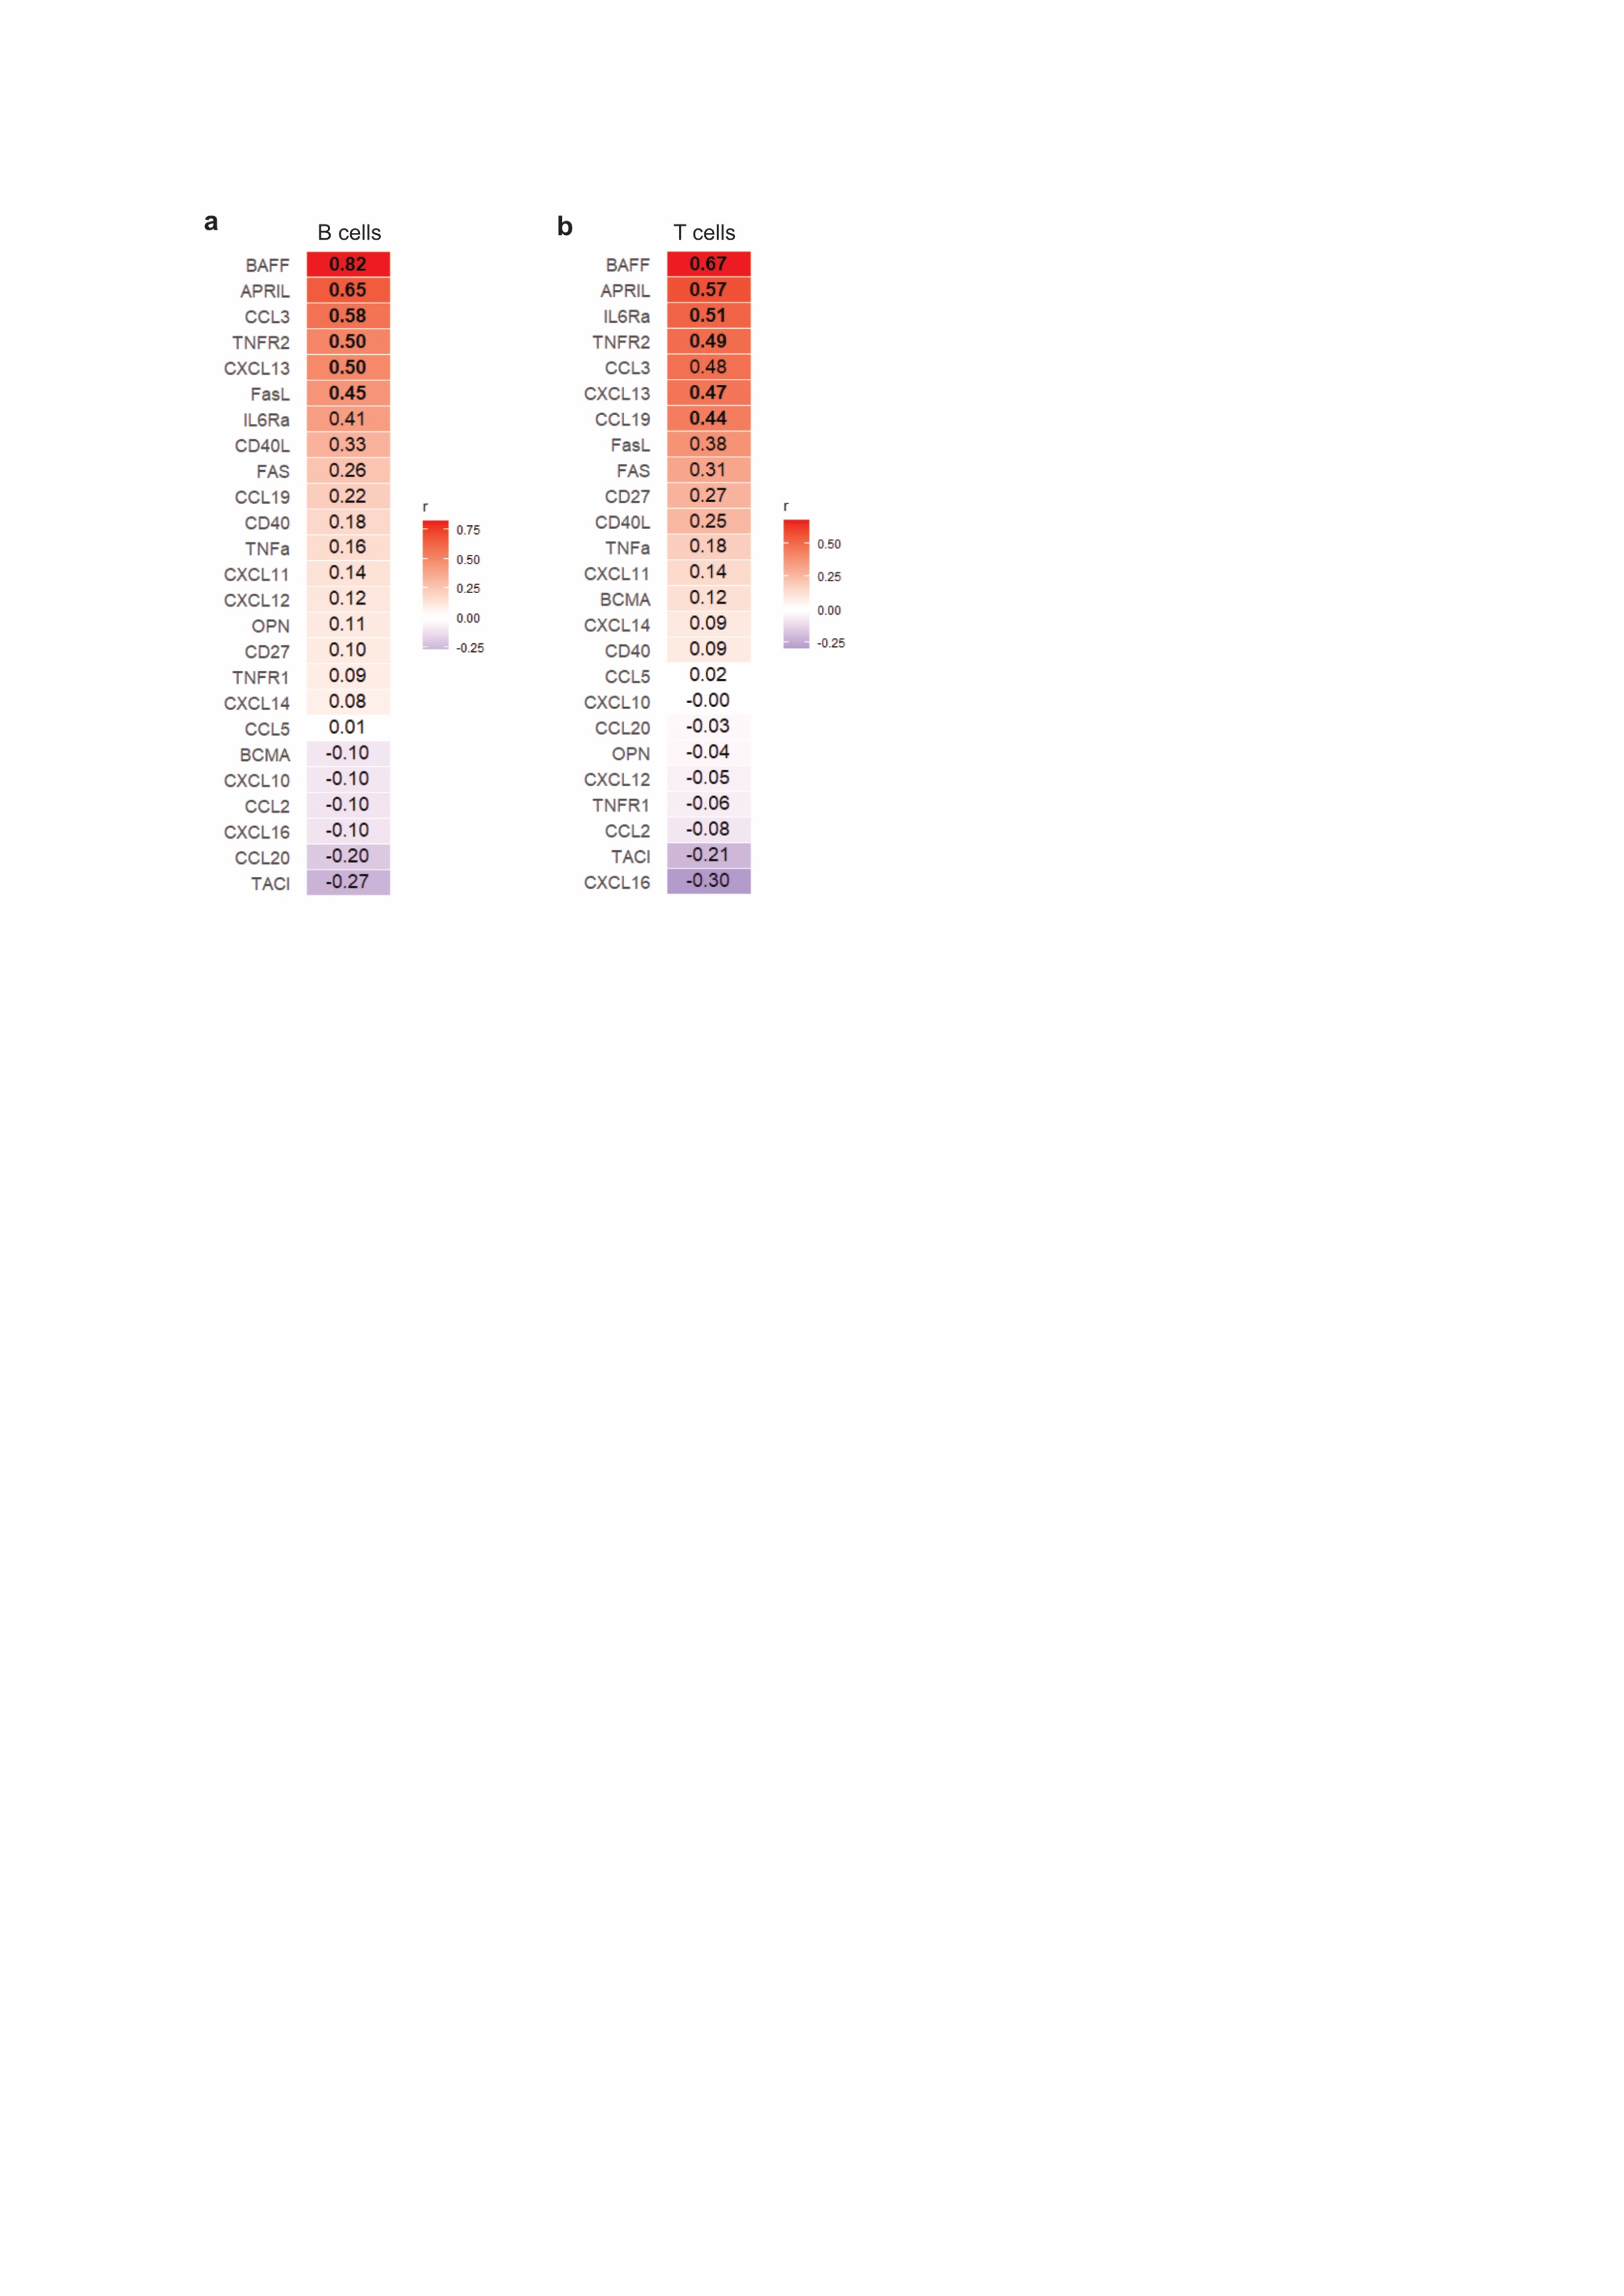


**Supplementary Figure 5. Correlation between soluble plasma analyte and single-cell TNFα signaling via NF-κB gene signature.** Pearson r coefficients for correlations between Luminex-assessed plasma soluble molecules levels and Hallmark’s “TNFα signaling via NF-κB” signature score, averaged across all the cell for each sample in single-cell analysis of sorted B- (**a**) and T- (**b**) cells. In bold coefficient corresponding to p values <0.05.


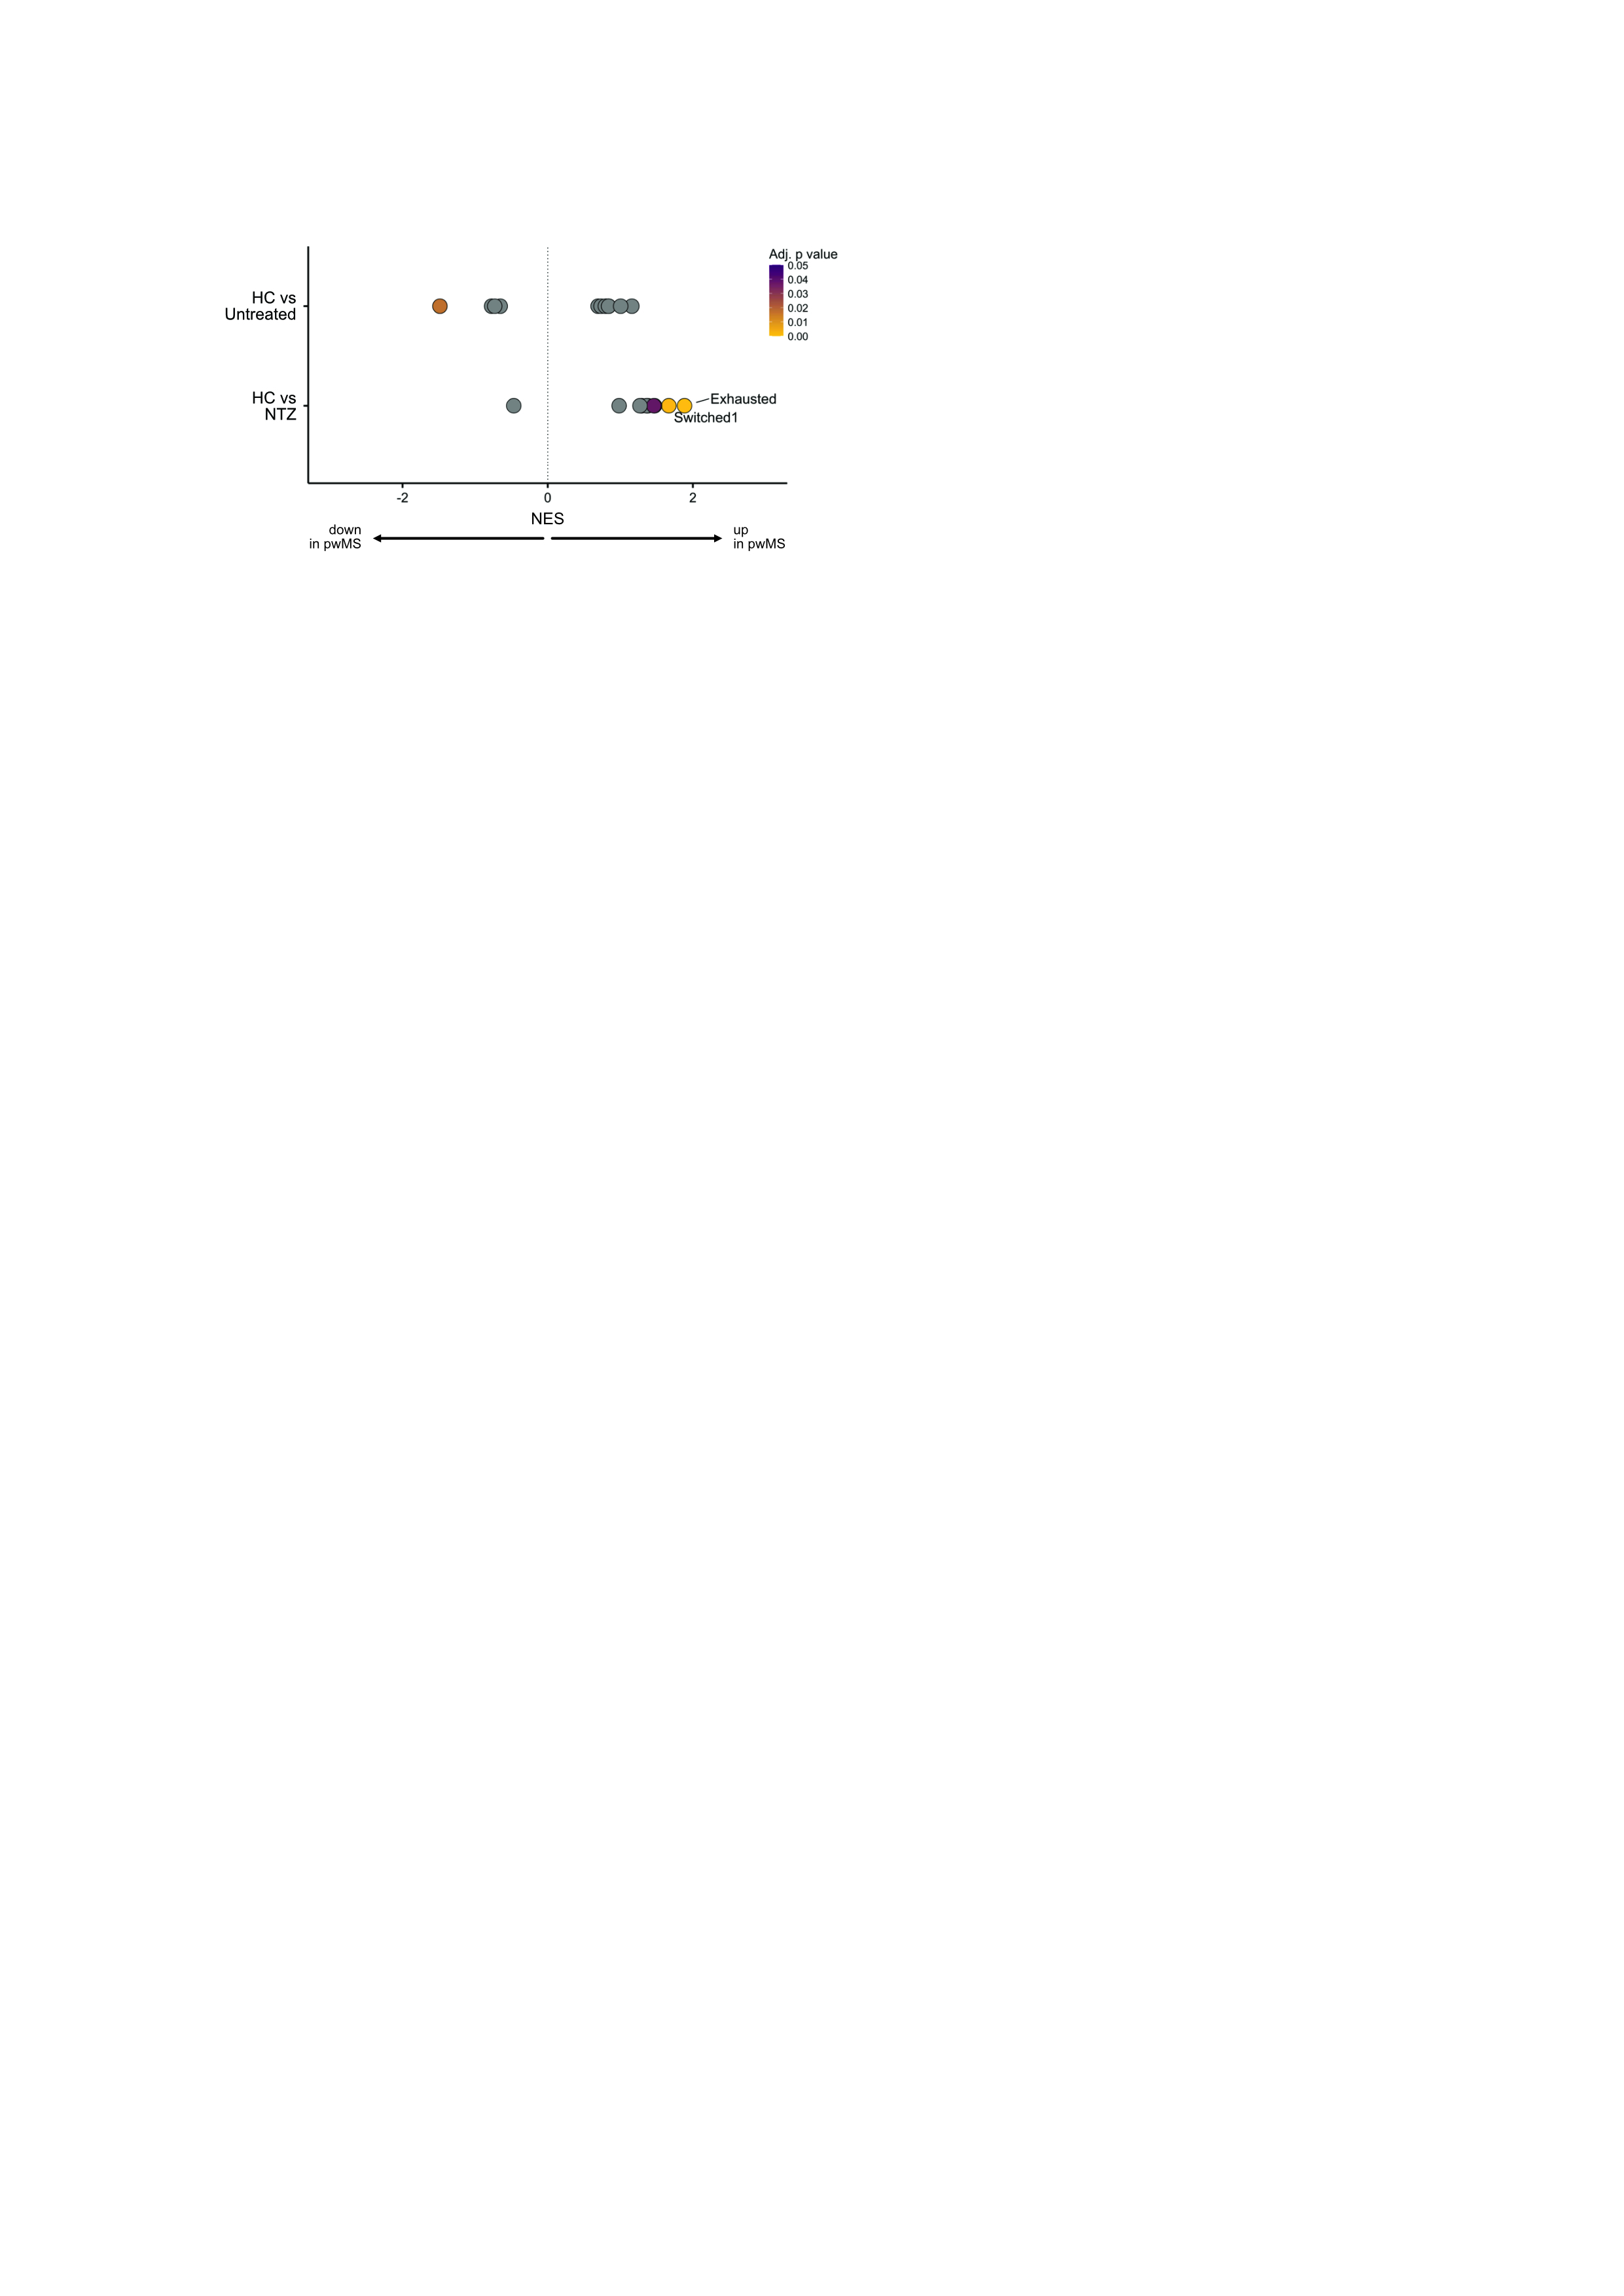


**Supplementary Figure 6. Enrichment of EBV lytic signature in NTZ compared to HC.** GSEA for EBV lytic gene signature on genes differentially expressed per B-cell cluster between untreated or NTZ-treated pwMS in comparison HC, with enrichment of the molecular signature in the Exhausted cluster in NTZ-treated pwMS.


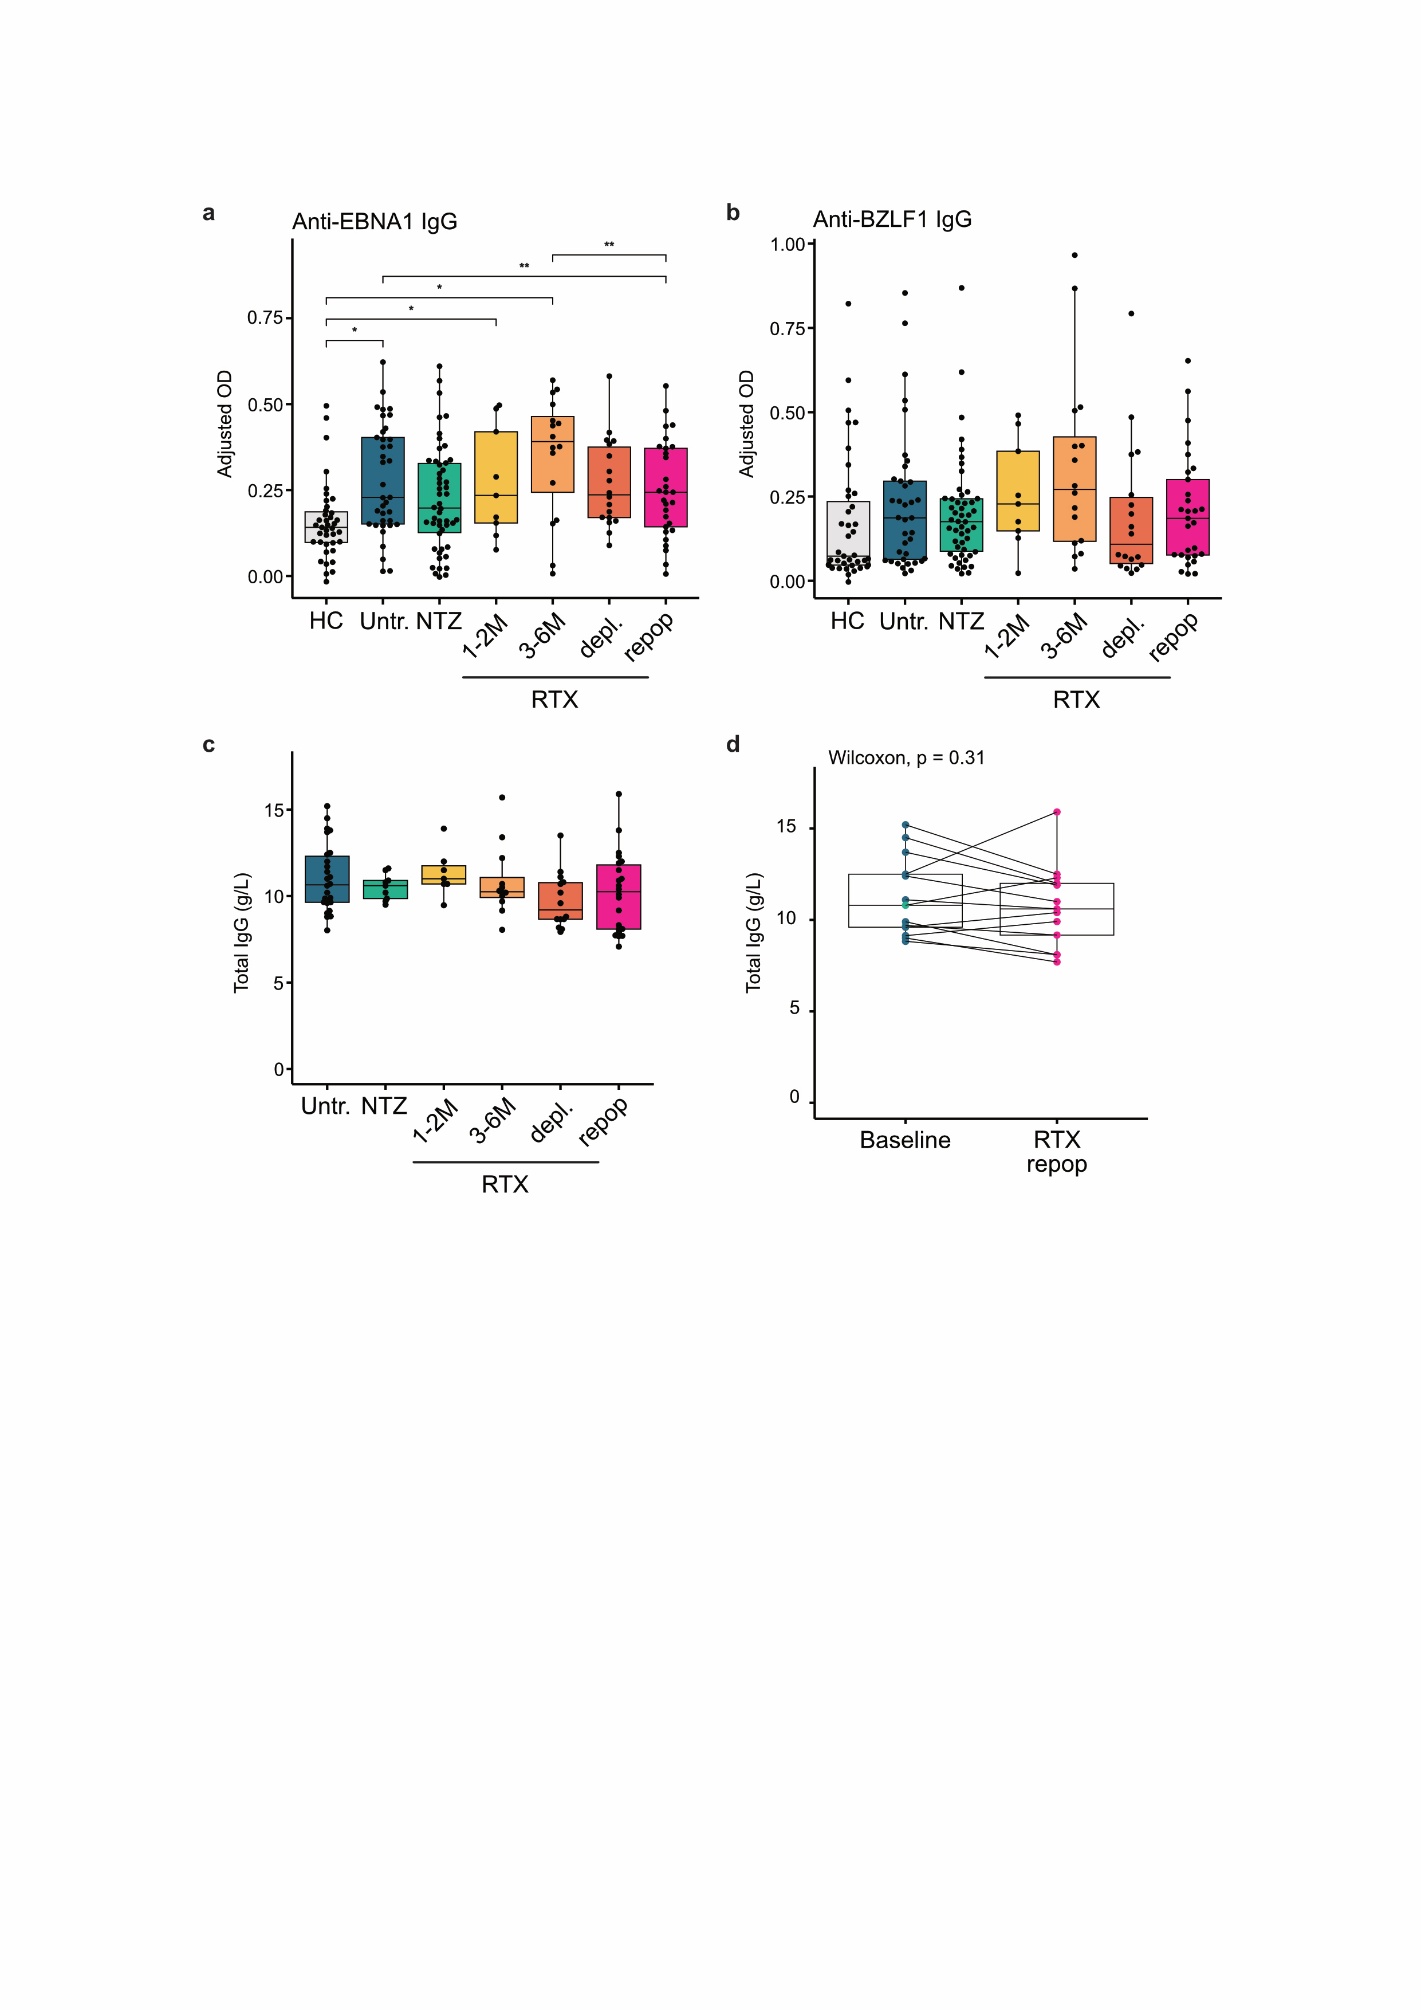


**Supplementary Figure 7. Whole cohort anti-EBNA1 and anti-BZLF1 IgG, and total IgG levels at sampling. a-b**,Whole cohort anti-EBNA1 (**a**) and anti-BZLF1 (**b**) IgG assessed by ELISA, significant pairwise differences post mixed-effects model are reported. * p<0.05, **p<0.01, ***p<0.001. **c-d,** Total IgG levels extracted from clinical data and considered at sampling if assessed within +/-90 days in the overall cohort (**c**, no significant pairwise differences as per mixed-effects model) and specifically in the paired baseline/RTX repop samples (**d**, Wilcoxon signed rank test).


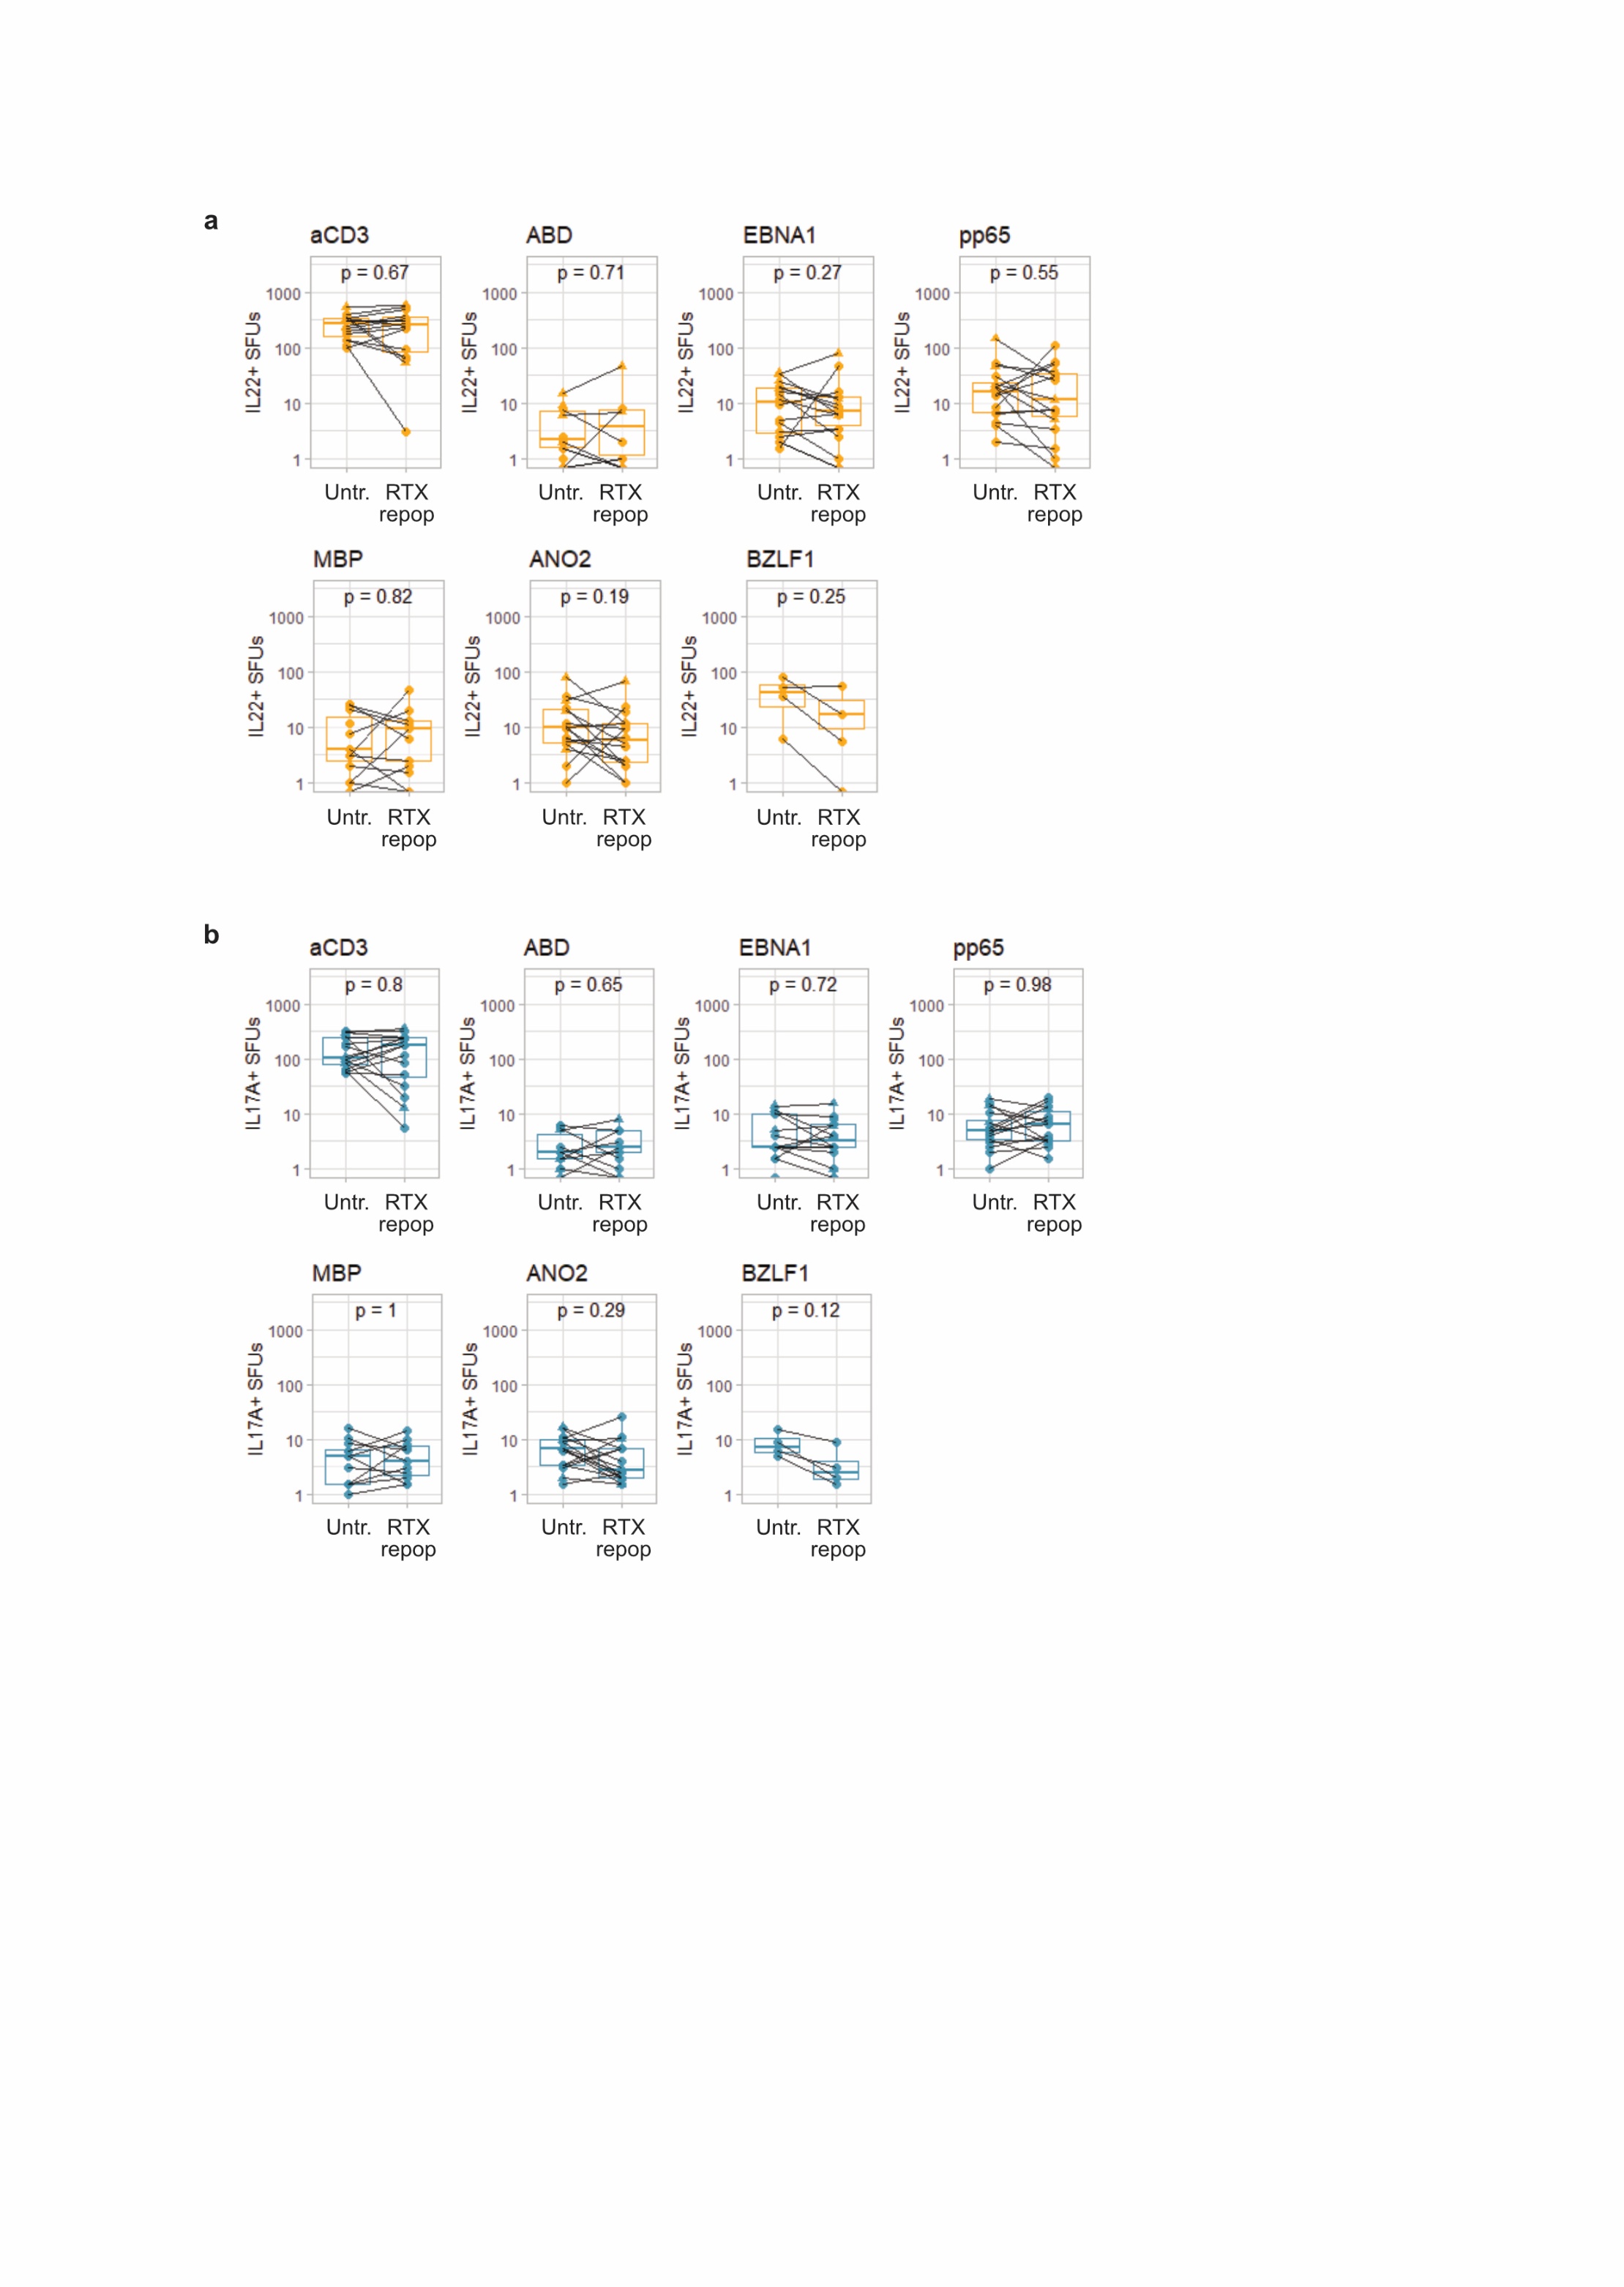


**Supplementary Figure 8. IL-22- and IL-17A-positive response to EBV antigens and self-proteins assessed by Fluorospot.** Counts of SFUs positive for IL-22 (**a**) or IL-17A (**b**) to ex vivo PBMC stimulation with anti-CD3, ABD, EBNA1, BZLF1, pp65, ANO2, MOG and MPB. Wilcoxon signed rank test p values are reported.


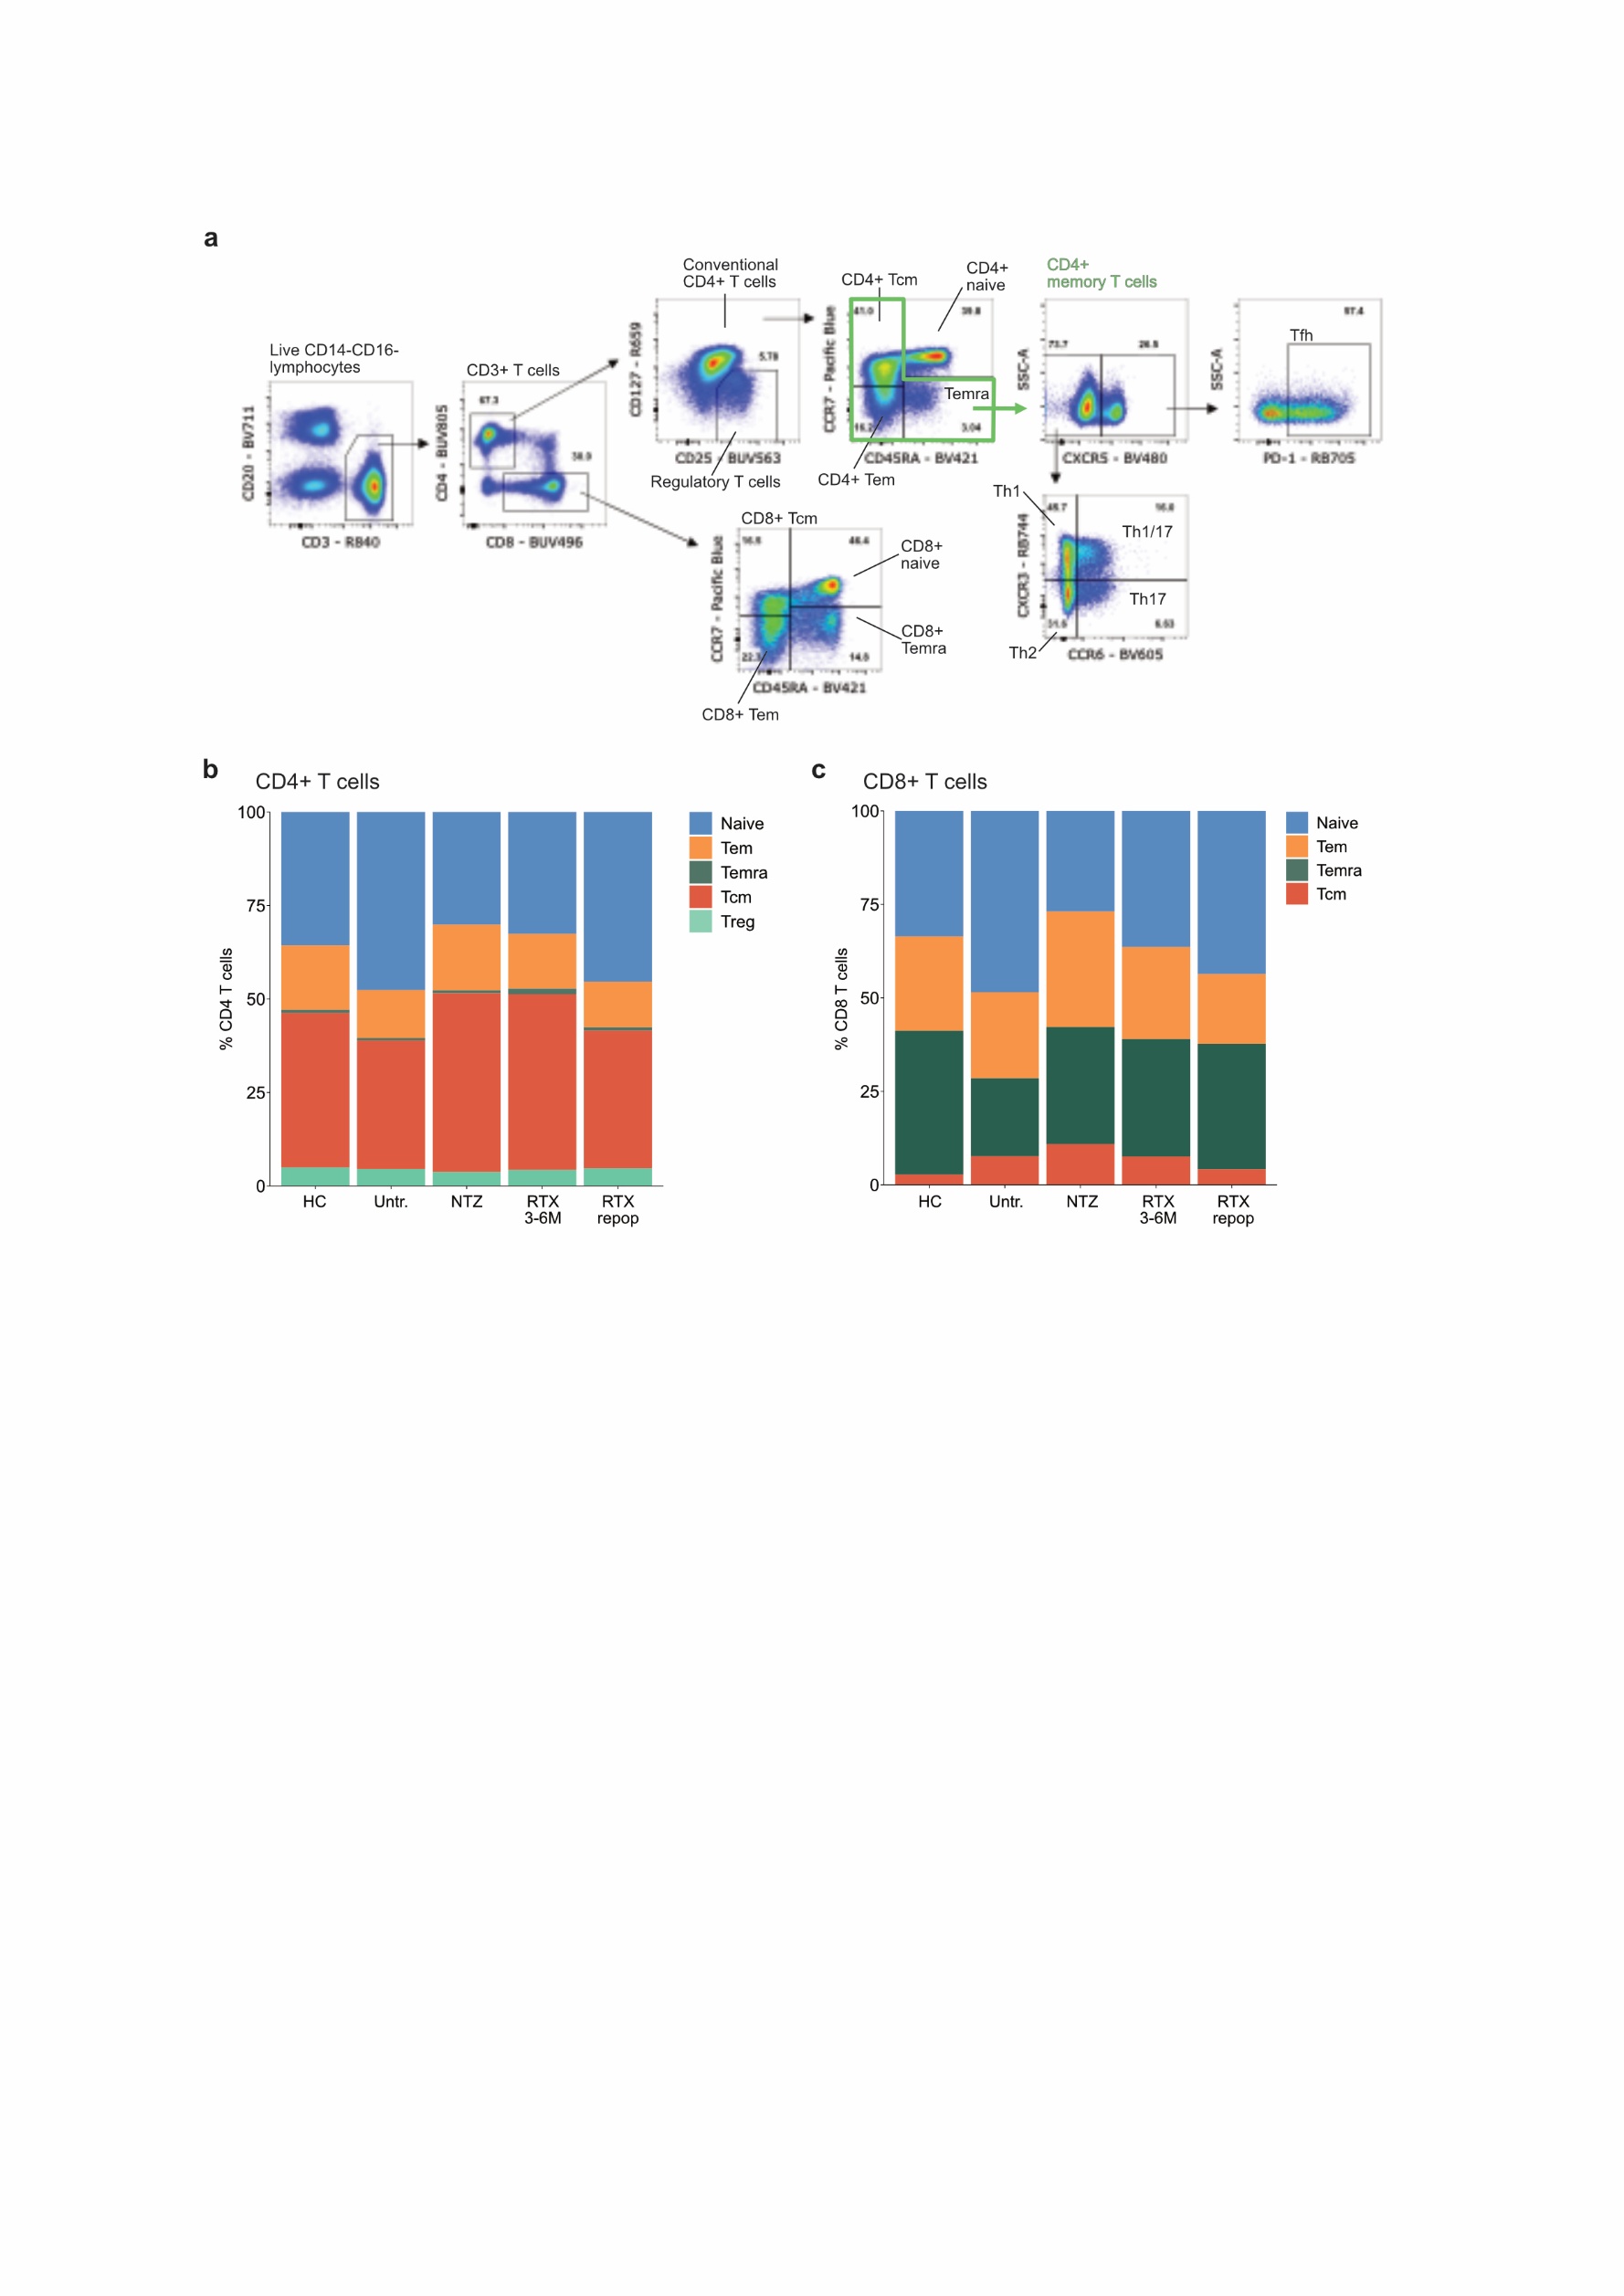


**Supplementary Figure 9. T-cell phenotype.** **a**, Gating strategy for T-cell immunophenotyping by FACS. **b-c**, Stacked bar plot of CD4+ (**b**) and CD8+ (**c**) T-cell subpopulation proportions across sampling groups.

**SUPPLEMENTARY TABLES**

**Supplementary Table 1. Overview of sample overlap across groups.**

**Supplementary Table 2. List of genes in the EBV lytic signatures.**

**Supplementary Table 3. Antibody panel used for B- and T-cell immunophenotyping by FACS.**

**Supplementary Table 4. Antibody panel used for B- and T-cell sorting and library preparation for scRNA-seq.**

**Supplementary Table 5. List of analytes included in Luminex analysis.**
