# Supplementary material
Source: Research Square preprint supplement (doi:10.21203/rs.3.rs-8544428/v1)
Supplement: Supplementary file 2 [file 363d6360e4852b37e8f180b0.xlsx]

## Sheet: Index
Supplementary Table	Content
1	Overview of sample overlap across groups
2	List of genes in the EBV lytic signatures
3	Antibody panel used for B and T cell immunophenotyping by FACS
4	Antibody panel used for B and T cell sorting and library preparation for scRNAseq
5	List of analytes included in Luminex analysis

## Sheet: Suppl Table 1
Supplementary Table 1. Overview of sample overlap across groups
	HC	Untreated	NTZ	RTX_1-2M	RTX_3-6M	RTX _depl	RTX_repop
00-085	0	1	0	0	1	0	0
01-062	0	0	1	0	1	0	0
06-025	0	0	0	0	1	0	1
06-128	0	0	1	0	1	0	0
10-004	0	1	0	0	1	0	2
10-050	0	1	1	0	1	0	0
10-107	0	0	0	0	1	0	0
12-217	0	1	0	0	0	1	0
12-223	0	1	0	0	0	1	0
13-002	0	0	0	0	1	0	0
13-027	0	0	1	0	0	0	2
13-046	0	0	0	0	0	0	1
13-109	1	0	0	0	0	0	0
13-117	1	0	0	0	0	0	0
13-142	0	0	1	0	1	1	0
13-164	0	1	0	0	0	0	1
14-009	0	1	0	1	0	0	0
14-035	1	0	0	0	0	0	0
14-043	0	1	0	0	0	1	0
14-050	0	1	0	0	0	1	0
14-103	0	0	1	0	0	0	2
14-127	0	0	0	0	0	1	0
14-128	0	0	0	0	1	0	1
14-150	0	0	1	0	0	0	2
14-176	0	1	0	0	0	1	0
14-177	0	0	0	0	1	0	0
14-217	0	1	0	0	0	0	1
14-229	0	1	0	0	0	1	0
14-245	0	0	1	0	0	0	2
14-250	0	1	0	0	0	1	0
15-014	1	0	0	0	0	0	0
15-016	0	0	0	0	0	0	1
15-028	1	0	0	0	0	0	0
15-041	0	1	0	0	0	1	0
15-043	1	0	0	0	0	0	0
15-051	1	0	0	0	0	0	0
15-056	1	0	0	0	0	0	0
15-059	1	0	0	0	0	0	0
15-092	1	0	0	0	0	0	0
15-107	1	0	0	0	0	0	0
15-110	1	0	0	0	0	0	0
15-132	0	0	0	0	1	0	0
15-151	0	0	0	0	1	0	1
15-158	0	0	0	0	1	0	0
15-165	0	0	2	0	1	0	1
15-181	0	1	0	0	1	1	0
15-182	0	0	0	0	1	0	1
15-201	0	2	0	0	1	0	2
15-207	0	1	0	0	1	0	0
15-212	0	2	0	0	1	1	1
15-218	0	1	0	0	1	0	0
15-233	0	1	0	0	1	0	0
15-238	0	0	1	0	1	0	3
15-240	0	0	0	0	1	0	0
15-259	0	0	0	0	0	0	1
16-011	0	1	0	0	0	0	1
16-075	0	0	0	0	0	0	1
16-090	0	1	0	0	0	0	1
16-092	0	0	0	0	0	1	1
16-109	0	1	0	0	0	0	1
16-160	0	1	0	0	0	1	0
16-161	0	1	0	0	0	1	0
16-212	0	1	0	0	0	1	0
16-227	0	1	0	0	0	0	1
16-252	0	1	0	0	0	1	0
17-022	0	1	0	0	0	1	0
17-041	0	1	0	0	0	1	0
17-044	0	1	0	0	0	1	0
17-051	0	1	0	0	0	1	0
17-057	0	1	0	0	0	1	0
17-059	0	1	0	0	0	0	1
17-063	0	0	0	0	1	0	0
17-106	0	0	0	0	0	1	0
17-115	0	1	0	0	0	0	1
17-125	0	1	0	1	0	0	0
18-027	1	0	0	0	0	0	0
18-037	1	0	0	0	0	0	0
18-038	1	0	0	0	0	0	0
18-039	1	0	0	0	0	0	0
18-059	1	0	0	0	0	0	0
18-090	0	0	0	1	0	0	0
19-009	0	1	0	1	0	0	0
19-011	0	1	0	1	0	0	0
19-012	0	0	0	0	0	0	1
19-014	0	1	0	1	0	0	0
19-015	0	1	0	1	0	0	0
19-021	0	1	0	0	0	0	1
19-033	0	1	0	0	0	0	1
19-035	0	0	1	0	0	0	1
19-039	0	1	0	1	0	0	0
19-046	1	0	0	0	0	0	0
19-049	0	1	0	0	0	0	1
19-055	0	0	0	1	0	0	0
19-057	1	0	0	0	0	0	0
19-062	0	0	0	0	0	0	1
19-067	0	1	0	0	0	0	1
19-088	0	1	0	0	0	0	1
19-090	0	1	0	0	0	0	1
19-102	0	1	0	0	0	0	1
20-007	0	1	0	0	0	0	1
20-014	0	1	0	0	0	0	1
20-031	0	1	0	0	0	0	1
20-042	0	1	0	0	0	0	1
20-059	0	1	0	0	0	0	1
20-109	0	1	0	0	0	0	1
20-194	0	1	0	0	0	0	1
21-029	0	1	0	0	0	0	1
21-070	0	1	0	0	0	0	1
EBV-HC001	1	0	0	0	0	0	0
EBV-HC002	1	0	0	0	0	0	0
EBV-HC003	1	0	0	0	0	0	0
EBV-HC004	1	0	0	0	0	0	0
EBV-HC005	1	0	0	0	0	0	0
EBV-HC006	1	0	0	0	0	0	0
EBV-HC007	1	0	0	0	0	0	0
EBV-HC008	1	0	0	0	0	0	0
EBV-HC009	1	0	0	0	0	0	0
EBV-HC010	1	0	0	0	0	0	0
EBV-HC011	1	0	0	0	0	0	0
EBV-HC012	1	0	0	0	0	0	0
EBV-HC013	1	0	0	0	0	0	0
EBV-HC014	1	0	0	0	0	0	0
EBV-HC015	1	0	0	0	0	0	0
EBV-HC016	1	0	0	0	0	0	0
EBV-HC017	1	0	0	0	0	0	0
EBV-HC018	1	0	0	0	0	0	0
HC1	1	0	0	0	0	0	0
HC10	1	0	0	0	0	0	0
HC3	1	0	0	0	0	0	0
HC4	1	0	0	0	0	0	0
NAT-001	0	0	1	0	0	0	0
NAT-002	0	0	1	0	0	0	0
NAT-003	0	0	1	0	0	0	0
NAT-004	0	0	1	0	0	0	0
NAT-005	0	0	1	0	0	0	0
NAT-006	0	0	1	0	0	0	0
NAT-007	0	0	1	0	0	0	0
NAT-008	0	0	1	0	0	0	0
NAT-009	0	0	1	0	0	0	0
NAT-010	0	0	1	0	0	0	0
NAT-011	0	0	1	0	0	0	0
NAT-012	0	0	1	0	0	0	0
NAT-013	0	0	1	0	0	0	0
NAT-015	0	0	1	0	0	0	0
NAT-016	0	0	1	0	0	0	0
NAT-017	0	0	1	0	0	0	0
NAT-019	0	0	1	0	0	0	0
NAT-020	0	0	1	0	0	0	0
NAT-021	0	0	1	0	0	0	0
NAT-022	0	0	1	0	0	0	0
NAT-023	0	0	1	0	0	0	0
NAT-024	0	0	1	0	0	0	0
NAT-025	0	0	1	0	0	0	0
NAT-026	0	0	1	0	0	0	0
NAT-027	0	0	1	0	0	0	0
NAT-028	0	0	1	0	0	0	0
NAT-029	0	0	1	0	0	0	0
NAT-030	0	0	1	0	0	0	0
NAT-031	0	0	1	0	0	0	0
NAT-032	0	0	1	0	0	0	0
NAT-033	0	0	1	0	0	0	0
NAT-034	0	0	1	0	0	0	0
NAT-035	0	0	1	0	0	0	0
NAT-036	0	0	1	0	0	0	0
NAT-037	0	0	1	0	0	0	0
NAT-038	0	0	1	0	0	0	0
NAT-039	0	0	1	0	0	0	0
NAT-040	0	0	1	0	0	0	0
NAT-041	0	0	1	0	0	0	0

## Sheet: Suppl Table 2
Supplementary Table 2. List of genes in the EBV lytic signatures
MIER2
BIN1
NFATC1
SFN
SGK1
CARS2
CAPN10-AS1
ZFAS1
EPM2AIP1
RPL12
ING1
MALAT1
MAP1LC3B
HDAC4
RPL18A
RP11-108L7.15
RPL32
RPL27A
RPS18
RPS13
RPL37
RPS5
RPS4X
RPL26
METTL12
RPL37A
RPS27
TPT1
RPL38
RPS12
RPS3A
EEF1B2
CD81
RPL10A
RPS28
RPL31
RPLP1
RPS25
ATP1A3
NHLH1
RPLP0
RPS11
RPL30
RPL36
RPLP2
RPL35
RPS19
RPL28
RPL21
RPSA
BAIAP2
RPL13A
RP11-473M20.16
RPL10
RPS7
RPS20
EEF1A1
RPL13
SMAD4
RPS15A
RPL19
CDHR5
RGS12
RPL23A
RPS24
RPS9
ZNF433
RPS14
METRNL
RPS6
RPL3
RPS15
RPL8
RPS3
RPS16
RPS23
RPL15
RPL18
RP11-635N19.1
RSPH3
ARHGEF10
UBA52
KIAA0513
ZC3H3
TMEM255B
RP11-572O17.1
ACOT11
FALEC
SLC45A4
EBER2
RLF
IRS2
CSF2RA
PPP1R27
PANX2
PLK5
RP11-127B20.3
AC114730.3
ATCAY
PHLDB3
PLCB3
HIC1
LINC00242
ATP4B
RP11-422P24.12
RP11-245D16.4
CTTN
RHBDF1
KAZN
TAS1R1
KIFC3
LY6K
RP11-830F9.6
ADARB1
GFPT2
PYGM
RP11-567M16.6
RP11-465B22.8
PLPP2
C19orf57
AL358852.1
RP5-1121A15.3
ERRFI1
PTRF
AC142528.1
ALPP
LINC00574
LINC01596
ZFR2
ARVCF
ASMT
MERTK
MSANTD1
SERPINB6
CTD-2302E22.4
OR2B6
BAIAP3
VANGL2
RGAG1
CBARP
RP11-378A13.2
DAND5
TFCP2L1
CAMKK1
DCHS2

## Sheet: Suppl Table 3
Supplementary Table 3. Antibody panel used for B and T cell immunophenotyping by FACS
Panel	Brand	Ref	Antigen	Fluorochrome	Clone
B+T	BD Horizon	562724	CCR6 / CD196	BV605	11A9
T	Biolegend	353210	CCR7 / CD197	PB	G043H7
B	BD Horizon	570514	CD11c	RB744	B-ly6
B+T	BD Horizon	612763	CD14	BUV737	M5E2
B	BD OptiBuild	752335	CD150	BUV615	A12
T	Biolegend	302078	CD16	UV387	3G8
B	Biolegend	302084	CD16	SB550	3G8
B	Biolegend	302290	CD19	UV387	HIB19
B+T	BD Horizon	563126	CD20	BV711	2H7
B	Biolegend	311110	CD24	AF647	ML5
B+T	BD Horizon	612918	CD25	BUV563	2A3
B	BD Horizon	564894	CD27	BV650	M-T271
T	eBioscience	366-0289-42	CD28	BUV615	CD28.2
B	BD Horizon	564001	CD3	BUV395	SK7
T	Cytek	SKU R7-20165	CD3	R840	SK3
B	Biolegend	303512	CD38	AF488	HIT2
B	eBioscience	368-0399-42	CD39	BUV805	eBioA1
T	BD Horizon	569196	CD4	BUV805	RPA-T4
B	Cytek	SKU R7-20165	CD4	R840	SK3
B	BD Horizon	565179	CD40	APC-R700	5C3
T	BD Horizon	562885	CD45RA	BV421	HI100
B+T	eBioscience	62-0699-42	CD69	Super Bright 436	FN50
T	eBioscience	416-0079-42	CD7	BV650	124-1D1
B	BD Horizon	565338	CD70	BV786	Ki-24
B	BD OptiBuild	746000	CD73	BB700	AD2
B+T	BD Horizon	612942	CD8	BUV496	RPA-T8
B	BD Horizon	551073	CD83	APC	HB15R
B	eBioscience	H021T03B08-A	CD86	NB660	IT2.2
T	BD OptiBuild	758755	CD95	RB613	DX2
B	Biolegend	353719	CXCR3 / CD183	PE-Cy7	G025H7
T	BD Horizon	570562	CXCR3 / CD183	RB744	1C6
B	Biolegend	356920	CXCR5 / CD185	BV421	J252D4
T	BD Horizon	566142	CXCR5 / CD185	BV480	RF8B2
B	BD Horizon	566113	HLA-DR	BV480	G46-6
T	Biolegend	307642	HLA-DR	BV785	L243
B	Biolegend	342608	HLA-E	PE-Dazzle594	3D12
B	Biolegend	348224	IgD	PacBlue	IA6-2
B	Biolegend	410723	IgG	APC-Fire750	M1310G05
B	Biolegend	314517	IgM	BV570	MHM-88
B	BD Horizon	563113	IgM	BV510	G20 127
T	Biolegend	312606	KIR2DL2/L3	PE	DX27
T	Biolegend	312708	KIR3DL1	PE	DX9
T	BD Horizon	570246	PD-1 / CD279	RB705	EH12.1
B	eBioscience	12-9500-42	TIGIT	PE	MBSA43
T	BD Horizon	564155	TCRgd	BUV395	B1

## Sheet: Suppl Table 4
Supplementary 4. Antibody panel used for B and T cell sorting and library preparation for scRNAseq
Antibody	Company	Final concentration
Live/Dead Aqua	Invitrogen	1:2000
CXCR5 APC-R700	BD Horizon	1:100
IgD FITC	BD Pharmingen	1:100
CD20 cFluor 450	Cytek Biosciences	1:100
CD4 FITC	Biolegend	1:100
CD3 PerCP/Cy5.5	Biolegend	1:100
CD161 PE	Biolegend	1:80
CD27 PE-Cy7	Biolegend	1:100
CD19 APC	BD Horizon	1:100
CD161 TotalSeq	Biolegend	1:200
CXCR5 TotalSeq	Biolegend	1:100
CD4 TotalSeq	Biolegend	1:130
CD8 TotalSeq	Biolegend	1:130
CD20 TotalSeq	Biolegend	1:130
HTO1/2 Hashtag TotalSeq	Biolegend	1:100

## Sheet: Suppl Table 5
Supplementary Table 5. List of analytes included in Luminex analysis
APRIL
CCL2
CCL7
CCL20
CXCL10
CXCL12
CXCL14
IL6
BAFF
CCL3
CCL19
CD40L
CXCL11
CXCL13
FasL
IL6Ra
TNFa
BCMA
CD27
CXCL16
TACI
TNFR2
CCL5
CD40
FAS
TNFR1
TGFb1
